# Supplementary material for: Aromatic Acids and Leucine Derivatives Produced from the Deep-Sea Actinomycetes Streptomyces chumphonensis SCSIO15079 with Antihyperlipidemic Activities
Source: MDPI journal article supplement (doi:10.3390/md20040259), 2022-04-07
Supplement: s1 [file s1]

---

## Supplementary Materials

### Aromatic Acids and Leucine Derivatives Produced from the Deep-Sea Actinomycetes *Streptomyces Chumphonensis* SCSIO15079 with Antihyperlipidemic Activities

Ziqi Su <sup>1</sup>, Kunlong Li <sup>2,3</sup>, Xiaowei Luo <sup>4</sup>, Yongyan Zhu <sup>1</sup>, Shaoyu Mai <sup>1</sup>, Quanhong Zhu <sup>1</sup>, Bin Yang <sup>2,3</sup>, Xuefeng Zhou <sup>2,3,\*</sup> and Huaming Tao <sup>1,\*</sup>

1 Guangdong Provincial Key Laboratory of Chinese Medicine Pharmaceutics, School of Traditional Chinese Medicine, Southern Medical University, Guangzhou 510515; ziqisl@163.com (Z.S.); yong-yanzhu0521@163.com (Y.Z.); shaoyumai@smu.edu.cn (S.M.); ; zqh@smu.edu.cn (Q.Z.)

2 CAS Key Laboratory of Tropical Marine Bio-Resources and Ecology, Guangdong Key Laboratory of Marine Materia Medica, South China Sea Institute of Oceanology, Chinese Academy of Sciences, Guangzhou 510301, China; likunlong16@mails.ucas.ac.cn (K.L.); yangbin@scsio.ac.cn (B.Y.)

3 Southern Marine Science and Engineering Guangdong Laboratory (Guangzhou), Guangzhou 511458, China

4 Institute of Marine Drugs, Guangxi University of Chinese Medicine, Nanning 530200, China; luoxiao-wei1991@126.com (X.L.)

\* Correspondence: xfzhou@scsio.ac.cn (X.Z.); taohm@smu.edu.cn (H.T.); Tel.: +86-61648770 (H.T.)

---

## List of Supplementary Materials

### 16S rRNA Sequence of the Strain SCSIO15079

**Figure S1.**  $^1\text{H}$  NMR spectrum of compound **1** ( $\text{CD}_3\text{OD}$ , 600 MHz)

**Figure S2.**  $^{13}\text{C}$  NMR spectrum of compound **1** ( $\text{CD}_3\text{OD}$ , 150 MHz)

**Figure S3.**  $^1\text{H}$ - $^1\text{H}$  COSY spectrum of compound **1** ( $\text{CD}_3\text{OD}$ )

**Figure S4.** HSQC spectrum of compound **1** ( $\text{CD}_3\text{OD}$ )

**Figure S5.** HMBC spectrum of compound **1** ( $\text{CD}_3\text{OD}$ )

**Figure S6.** HRESIMS spectrum of compound **1**

**Figure S7.** IR spectrum of compound **1**

**Figure S8.** UV spectrum of compound **1**

**Figure S9.**  $^1\text{H}$  NMR spectrum of compound **2** ( $\text{CD}_3\text{OD}$ , 600 MHz)

**Figure S10.**  $^{13}\text{C}$  NMR spectrum of compound **2** ( $\text{CD}_3\text{OD}$ , 150 MHz)

**Figure S11.**  $^1\text{H}$ - $^1\text{H}$  COSY spectrum of compound **2** ( $\text{CD}_3\text{OD}$ )

**Figure S12.** HSQC spectrum of compound **2** ( $\text{CD}_3\text{OD}$ )

**Figure S13.** HMBC spectrum of compound **2** ( $\text{CD}_3\text{OD}$ )

**Figure S14.** HRESIMS spectrum of compound **2**

**Figure S15.** IR spectrum of compound **2**

**Figure S16.** UV spectrum of compound **2**

**Figure S17.**  $^1\text{H}$  NMR spectrum of compound **3** ( $\text{CD}_3\text{OD}$ , 600 MHz)

**Figure S18.**  $^{13}\text{C}$  NMR spectrum of compound **3** ( $\text{CD}_3\text{OD}$ , 150 MHz)

**Figure S19.**  $^1\text{H}$ - $^1\text{H}$  COSY spectrum of compound **3** ( $\text{CD}_3\text{OD}$ )

**Figure S20.** HSQC spectrum of compound **3** ( $\text{CD}_3\text{OD}$ )

**Figure S21.** HMBC spectrum of compound **3** ( $\text{CD}_3\text{OD}$ )

**Figure S22.** HRESIMS spectrum of compound **3**

**Figure S23.** UV spectrum of compound **3**

---

**Figure S24.**  $^1\text{H}$  NMR spectrum of compound **4** ( $\text{CD}_3\text{OD}$ , 600 MHz)

**Figure S25.**  $^{13}\text{C}$  NMR spectrum of compound **4** ( $\text{CD}_3\text{OD}$ , 150 MHz)

**Figure S26.**  $^1\text{H}$ - $^1\text{H}$  COSY spectrum of compound **4** ( $\text{CD}_3\text{OD}$ )

**Figure S27.** HSQC spectrum of compound **4** ( $\text{CD}_3\text{OD}$ )

**Figure S28.** HMBC spectrum of compound **4** ( $\text{CD}_3\text{OD}$ )

**Figure S29.** HRESIMS spectrum of compound **4**

**Figure S30.** UV spectrum of compound **4**

**Figure S31.**  $^1\text{H}$  NMR spectrum of compound **5** ( $\text{CD}_3\text{OD}$ , 600 MHz)

**Figure S32.**  $^{13}\text{C}$  NMR spectrum of compound **5** ( $\text{CD}_3\text{OD}$ , 150 MHz)

**Figure S33.**  $^1\text{H}$ - $^1\text{H}$  COSY spectrum of compound **5** ( $\text{CD}_3\text{OD}$ )

**Figure S34.** HSQC spectrum of compound **5** ( $\text{CD}_3\text{OD}$ )

**Figure S35.** HMBC spectrum of compound **5** ( $\text{CD}_3\text{OD}$ )

**Figure S36.** HRESIMS spectrum of compound **5**

**Figure S37.** UV spectrum of compound **5**

**Figure S38.**  $^1\text{H}$  NMR spectrum of compound **6** ( $\text{CD}_3\text{OD}$ , 600 MHz)

**Figure S39.**  $^{13}\text{C}$  NMR spectrum of compound **6** ( $\text{CD}_3\text{OD}$ , 150 MHz)

**Figure S40.**  $^1\text{H}$ - $^1\text{H}$  COSY spectrum of compound **6** ( $\text{CD}_3\text{OD}$ )

**Figure S41.** HSQC spectrum of compound **6** ( $\text{CD}_3\text{OD}$ )

**Figure S42.** HMBC spectrum of compound **6** ( $\text{CD}_3\text{OD}$ )

**Figure S43.** HRESIMS spectrum of compound **6**

**Figure S44.** UV spectrum of compound **6**

**Figure S45.**  $^1\text{H}$  NMR spectrum of compound **7** ( $\text{CD}_3\text{OD}$ , 600 MHz)

**Figure S46.**  $^{13}\text{C}$  NMR spectrum of compound **7** ( $\text{CD}_3\text{OD}$ , 150 MHz)

**Figure S47.**  $^1\text{H}$ - $^1\text{H}$  COSY spectrum of compound **7** ( $\text{CD}_3\text{OD}$ )

**Figure S48.** HSQC spectrum of compound **7** ( $\text{CD}_3\text{OD}$ )

---

**Figure S49.** HMBC spectrum of compound **7** (CD<sub>3</sub>OD)

**Figure S50.** HRESIMS spectrum of compound **7**

**Figure S51.** UV spectrum of compound **7**

**Figure S52.** <sup>1</sup>H NMR spectrum of compound **8** (MDSO-d<sub>6</sub>, 600 MHz)

**Figure S53.** <sup>13</sup>C NMR spectrum of compound **8** (MDSO-d<sub>6</sub>, 150 MHz)

**Figure S54.** <sup>1</sup>H-<sup>1</sup>H COSY spectrum of compound **8** (MDSO-d<sub>6</sub>)

**Figure S55.** HSQC spectrum of compound **8** (MDSO-d<sub>6</sub>)

**Figure S56.** HMBC spectrum of compound **8** (MDSO-d<sub>6</sub>)

**Figure S57.** HRESIMS spectrum of compound **8**

**Figure S58.** IR spectrum of compound **8**

**Figure S59.** UV spectrum of compound **8**

**Figure S60.** <sup>1</sup>H NMR spectrum of compound **9** (CD<sub>3</sub>OD, 600 MHz)

**Figure S61.** <sup>13</sup>C NMR spectrum of compound **9** (CD<sub>3</sub>OD, 150 MHz)

**Figure S62.** <sup>1</sup>H-<sup>1</sup>H COSY spectrum of compound **9** (CD<sub>3</sub>OD)

**Figure S63.** HSQC spectrum of compound **9** (CD<sub>3</sub>OD)

**Figure S64.** HMBC spectrum of compound **9** (CD<sub>3</sub>OD)

**Figure S65.** HRESIMS spectrum of compound **9**

**Figure S66.** IR spectrum of compound **9**

**Figure S67.** UV spectrum of compound **9**

**Figure S68.** Hydrolysis reaction of compound **7**

**Table S1.** Cell Viability (%) of HepG2 treated with compounds **1-9** and lovastatin (5, 10, and 20 μM).

---

**16S rRNA Sequence of the Strain SCSIO15079**

CGCTTCGGTGGTGGATTAGTGGCGAACGGGTGAGTAACACGTGGGCAATCTGCCCTG  
CACTCTGGGACAAGCCCTGGAAACGGGGTCTAATACCGGATACGACACAGGAAGGC  
ATCTTCTCTGTGTGGAAAGCTCCGGCGGTGCAGGATGAGCCCGCGGCCTATCAGCTTG  
TTGGTGGGGTGATGGCCTACCAAGGCGACGACGGGTAGCCGGCCTGAGAGGGCGACC  
GGCCACACTGGGACTGAGACACGGCCCAGACTCCTACGGGAGGCAGCAGTGGGGAA  
TATTGCACAATGGGCGAAAGCCTGATGCAGCGACGCCGCGTGAGGGATGACGGCCTT  
CGGGTTGTAAACCTCTTTCAGCAGGGAAGAAGCGCAAGTGACGGTACCTGCAGAAGA  
AGCACCGGCTAACTACGTGCCAGCAGCCGCGGTAATACGTAGGGTGCGAGCGTTGTC  
CGGAATTATTGGGCGTAAAGAGCTCGTAGGCGGCTTGTACGTCCGATGTGAAAGCC  
CGGGGCTTAACCCCGGGTCTGCATTTCGATACGGGCAGGCTAGAGTTCGGTAGGGGAG  
ATCGGAATTCCTGGTGTAGCGGTGAAATGCGCAGATATCAGGAGGAACACCGGTGGC  
GAAGGCGGATCTCTGGGCCGATACTGACGCTGAGGAGCGAAAGCGTGGGGAGCGAA  
CAGGATTAGATACCCTGGTAGTCCACGCCGTAAACGTTGGGAACTAGGTGTGGGCGA  
CATTCCACGTTCGTCCGTGCCGCAGCTAACGCATTAAGTTCCCCGCCTGGGGAGTACGG  
CCGCAAGGCTAAAACTCAAAGGAATTGACGGGGGGCCCGCACAAAGCGGCGGAGCATG  
TGGCTTAATTCGACGCAACGCGAAGAACCTTACCAAGGCTTGACATACATCGGAAAG  
CCGTAGAGATACGGCCCCCCTTGTGGTCGGTGTACAGGTGGTGCATGGCTGTCGTCAG  
CTCGTGTCGTGAGATGTTGGGTAAAGTCCCGCAACGAGCGCAACCCCTTATTCTGTGTT  
GCCAGCATGCCTTTCGGGGTGATGGGGACTCACAGGAGACTGCCGGGGTCAACTCGG  
AGGAAGGTGGGGACGACGTCAAGTCATCATGCCCCTTATGTCTTGGGCTGCACACGT  
GCTACAATGGCCGGTACAATGAGCTGCGATACCGTGAGGTGGAGCGAATCTCAAAAA  
GCCGGTCTCAGTTCGGATTGGGGTCTGCAACTCGACCCCATGAAGTCGGAGTCGCTA  
GTAATCGCAGATCAGCATTGCTGCGGTGAATACGTTCCCGGGCCTTGTACACACCGCC  
CGTCACGTACGAAAGTCGGTAACACCCGAAGCCGGTGGCCTAACCCC

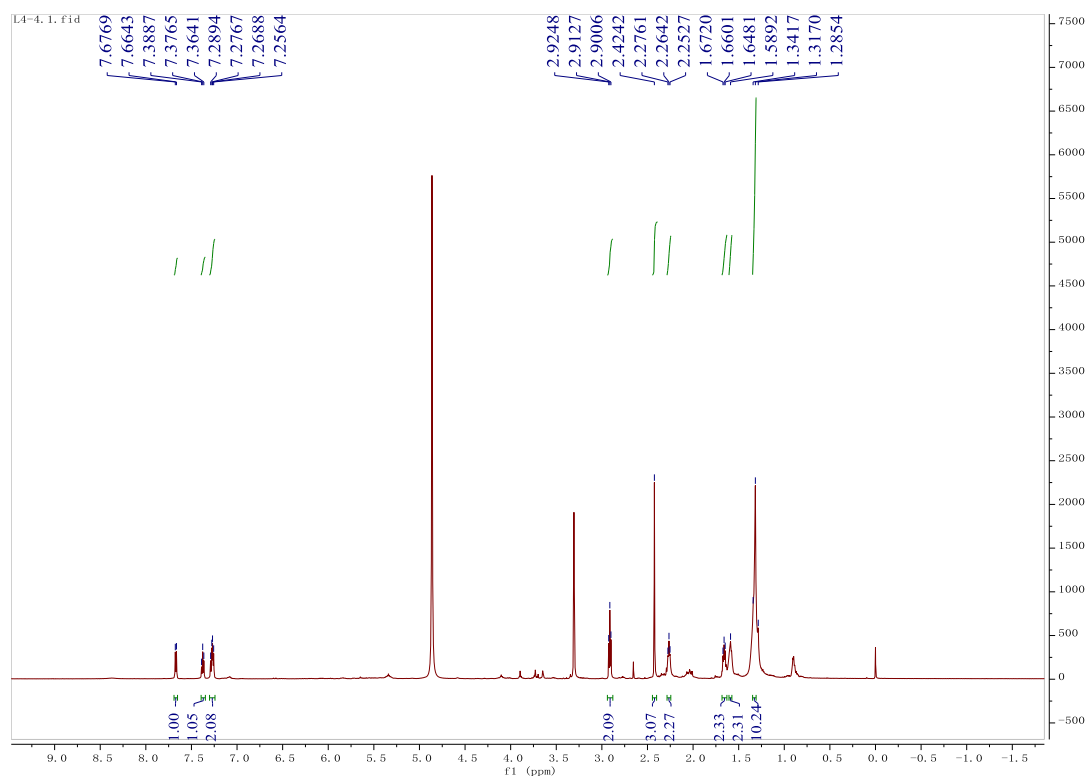

**Figure S1.** <sup>1</sup>H NMR spectrum of compound **1** (CD<sub>3</sub>OD, 600 MHz)

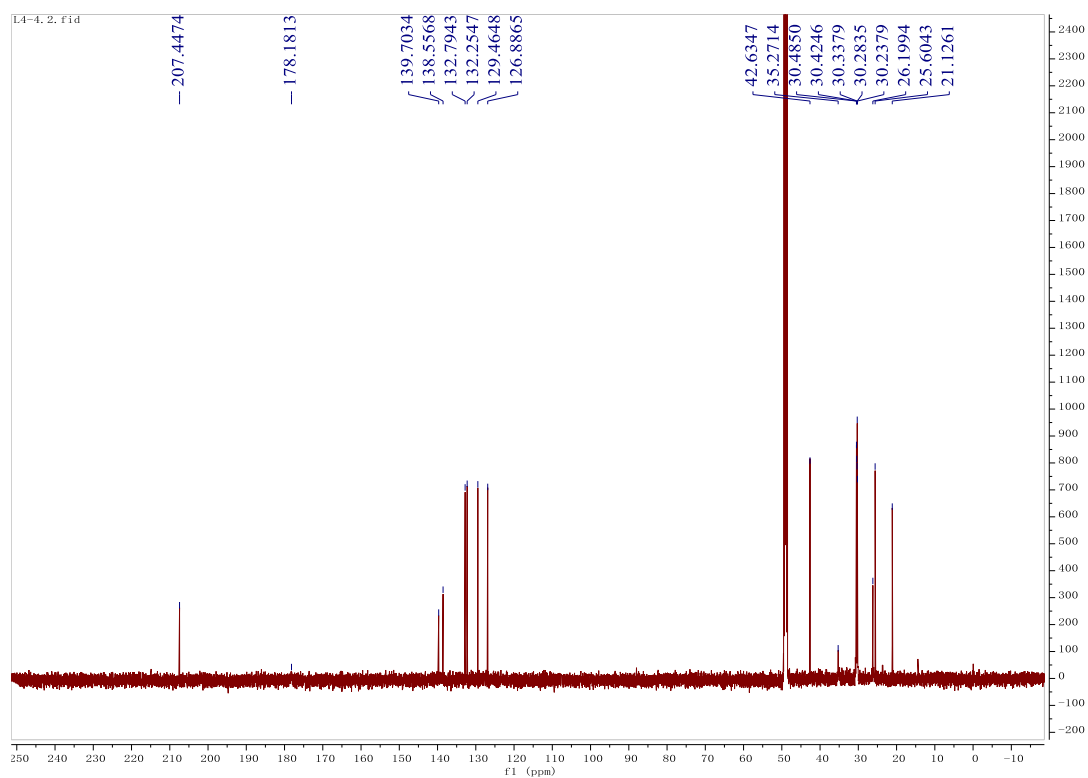

**Figure S2.** <sup>13</sup>C NMR spectrum of compound **1** (CD<sub>3</sub>OD, 150 MHz)

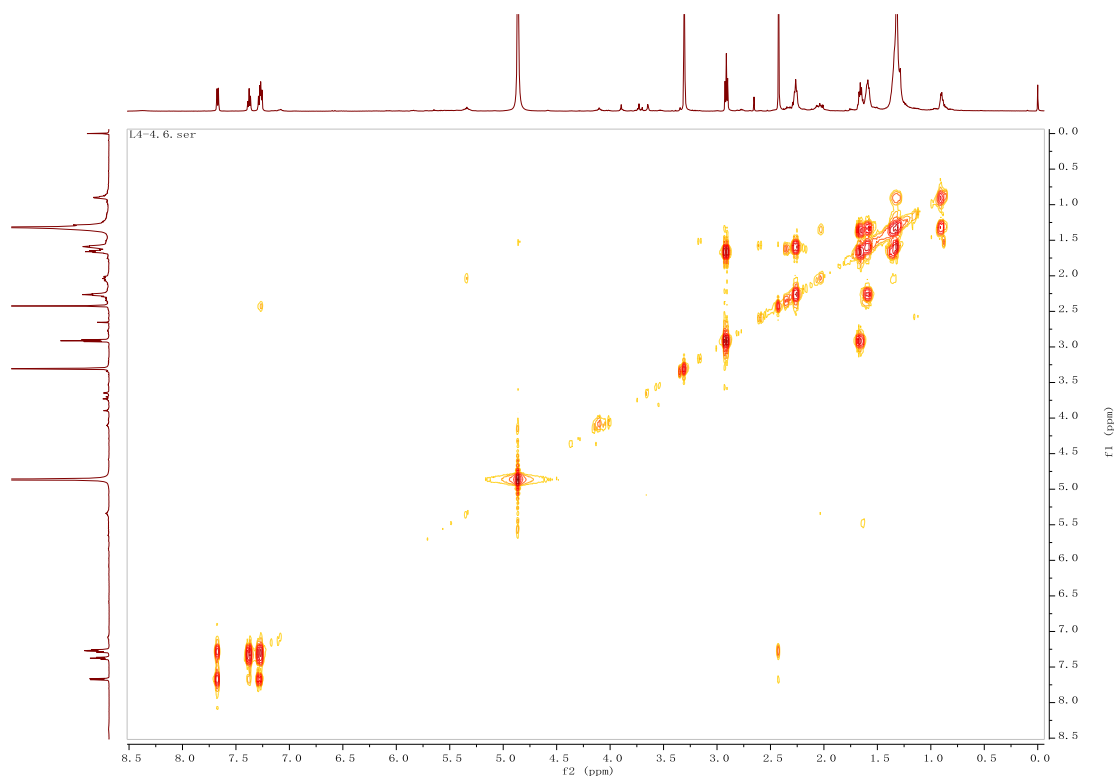

**Figure S3.**  $^1\text{H}$ - $^1\text{H}$  COSY spectrum of compound **1** ( $\text{CD}_3\text{OD}$ )

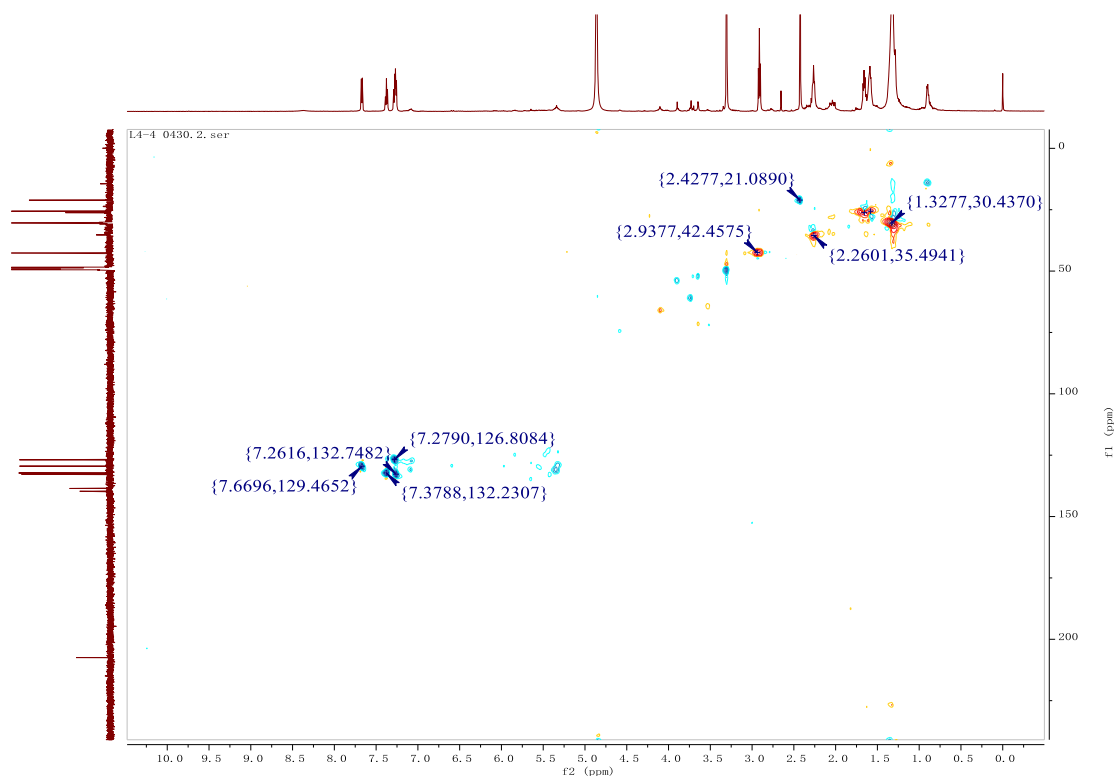

**Figure S4.** HSQC spectrum of compound **1** ( $\text{CD}_3\text{OD}$ )

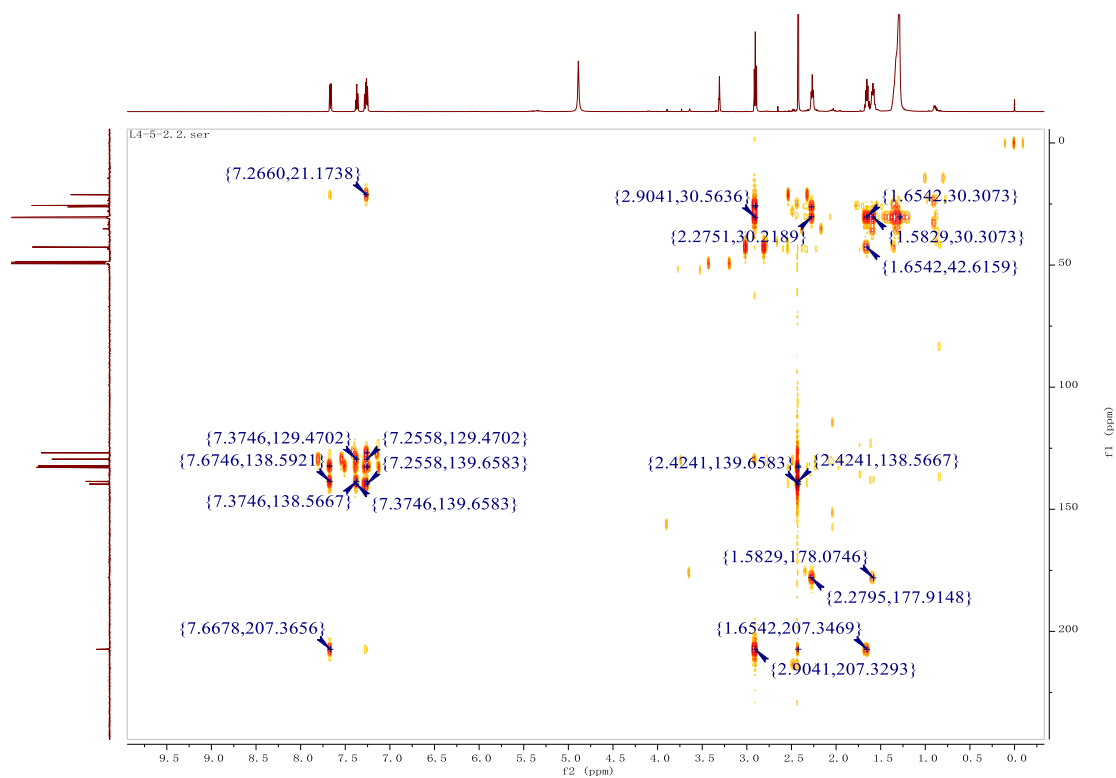

**Figure S5.** HMBC spectrum of compound **1** ( $\text{CD}_3\text{OD}$ )

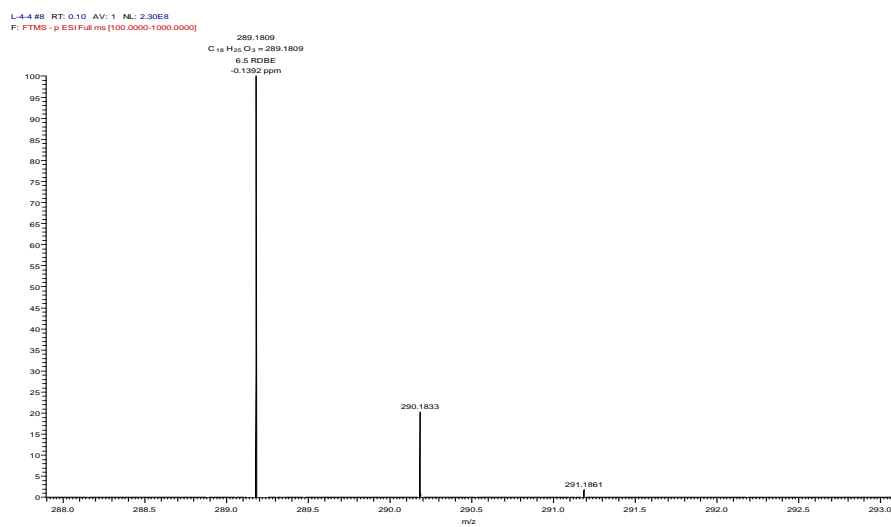

**Figure S6.** HRESIMS spectrum of compound **1**



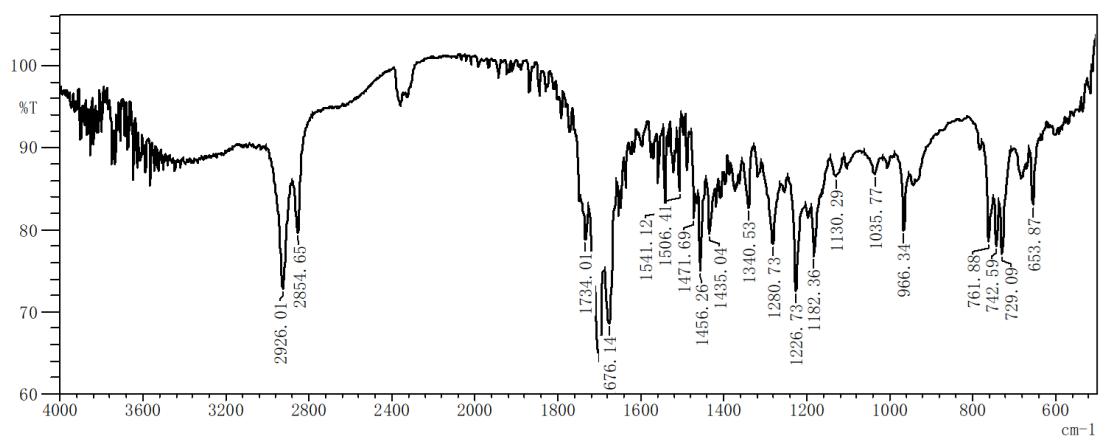

**Figure S7.** IR spectrum of compound **1**

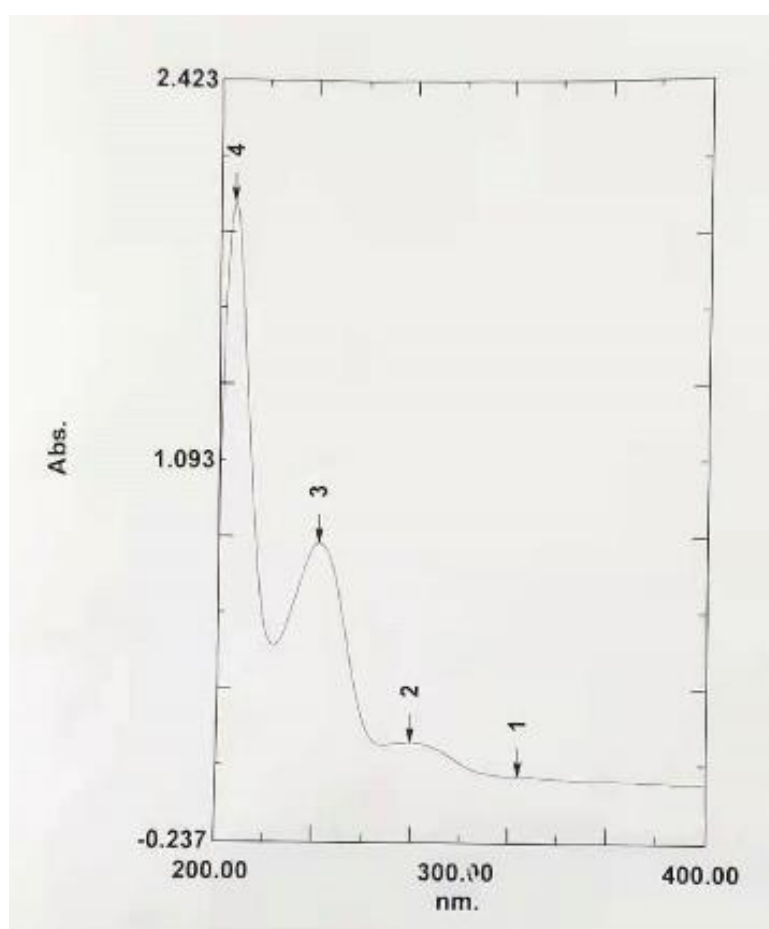

**Figure S8.** UV spectrum of compound **1**

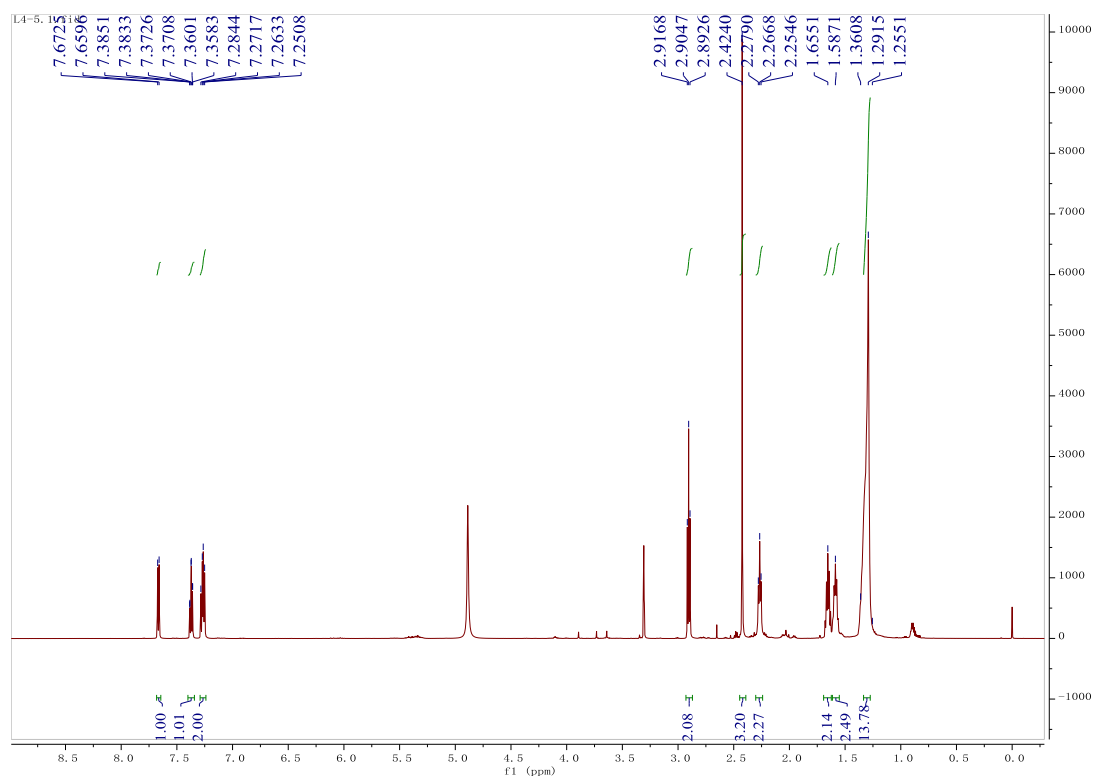

**Figure S9.** <sup>1</sup>H NMR spectrum of compound **2** (CD<sub>3</sub>OD, 600 MHz)

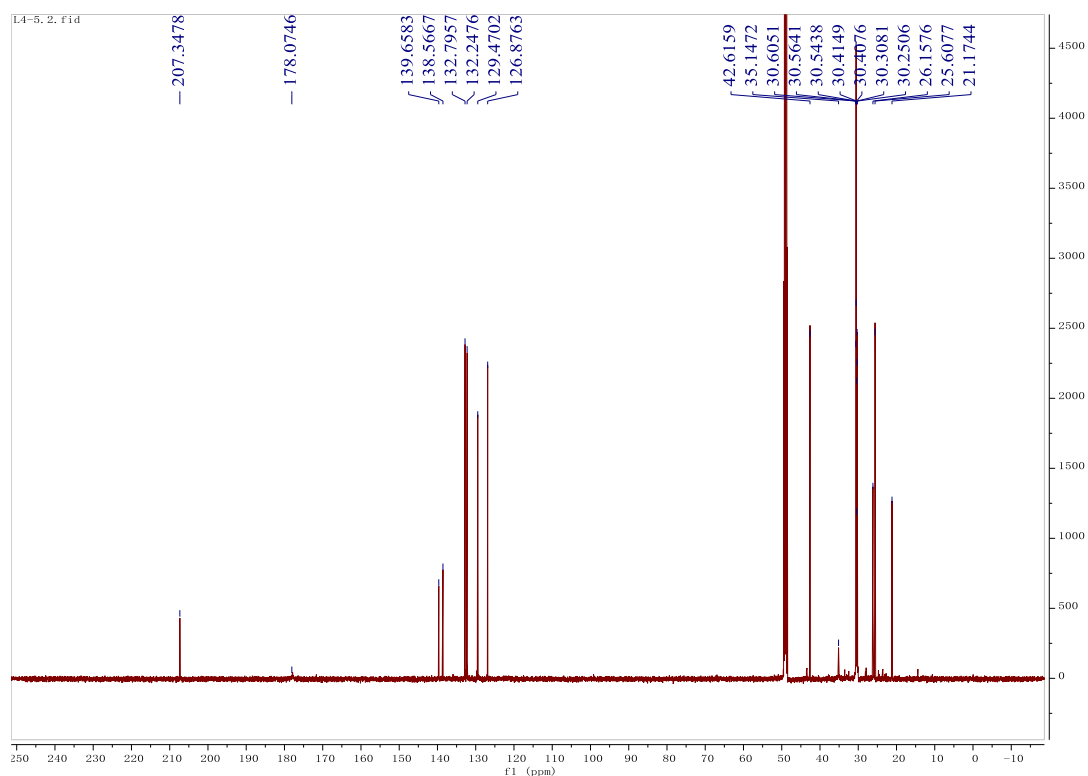

**Figure S10.** <sup>13</sup>C NMR spectrum of compound **2** (CD<sub>3</sub>OD, 150 MHz)

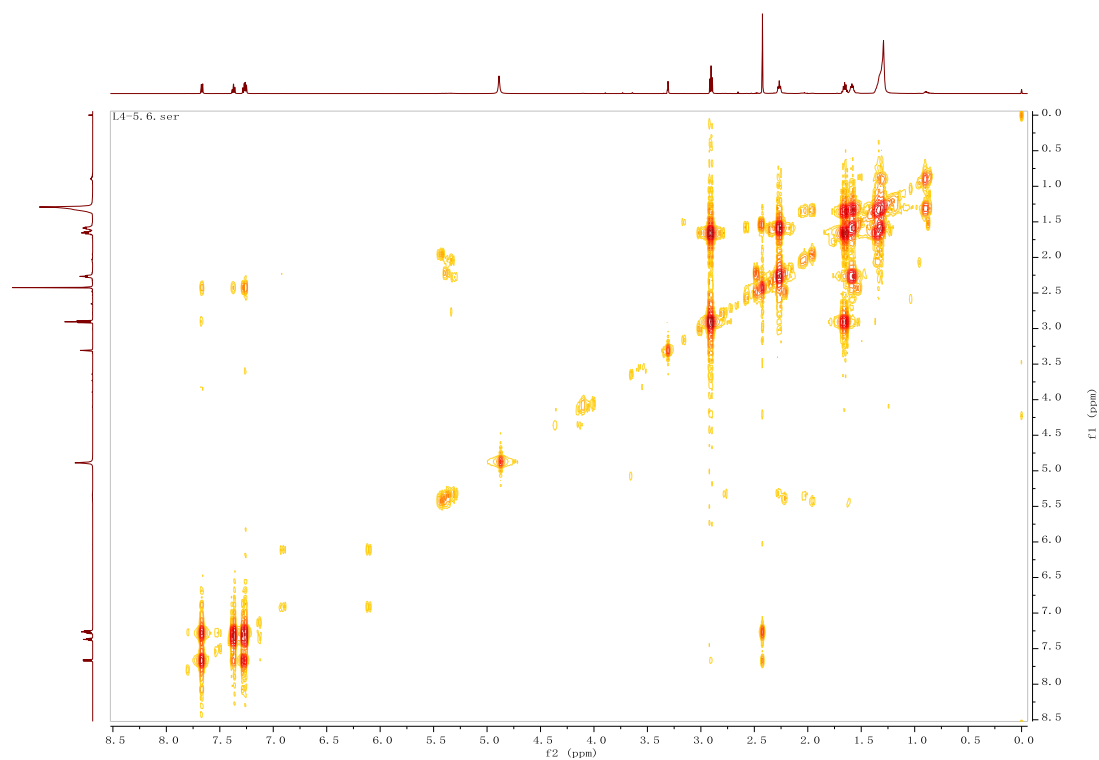

**Figure S11.**  $^1\text{H}$ - $^1\text{H}$  COSY spectrum of compound **2** ( $\text{CD}_3\text{OD}$ )

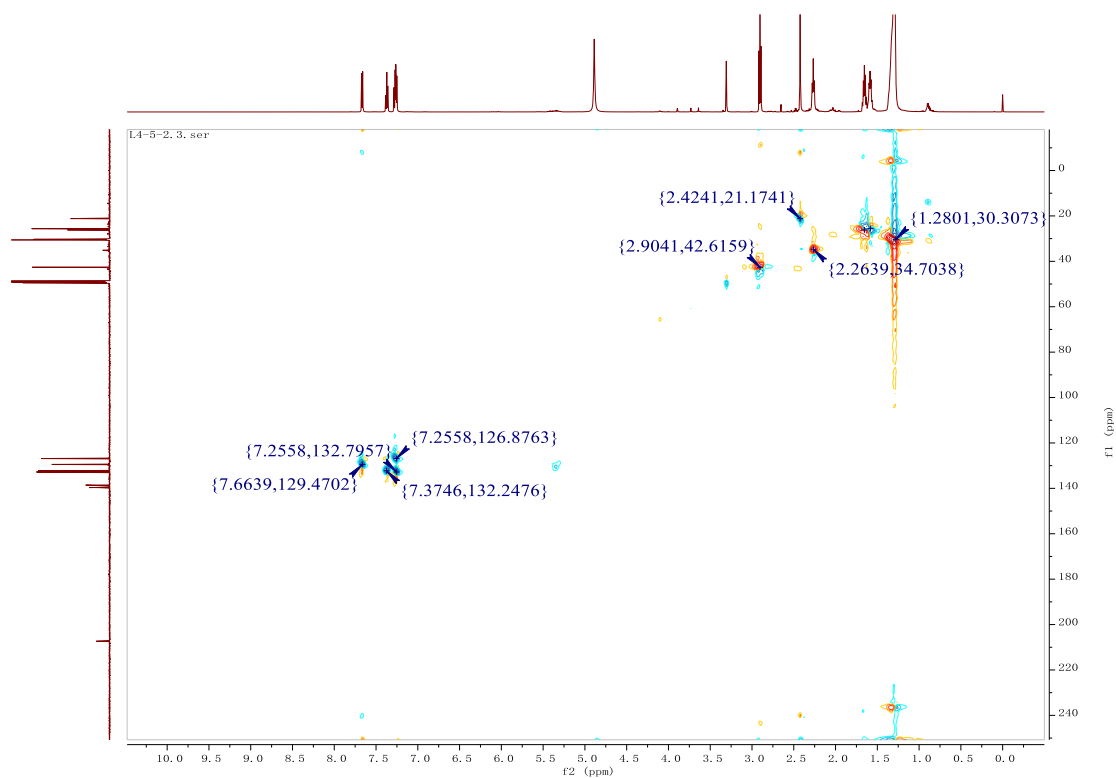

**Figure S12.** HSQC spectrum of compound **2** ( $\text{CD}_3\text{OD}$ )

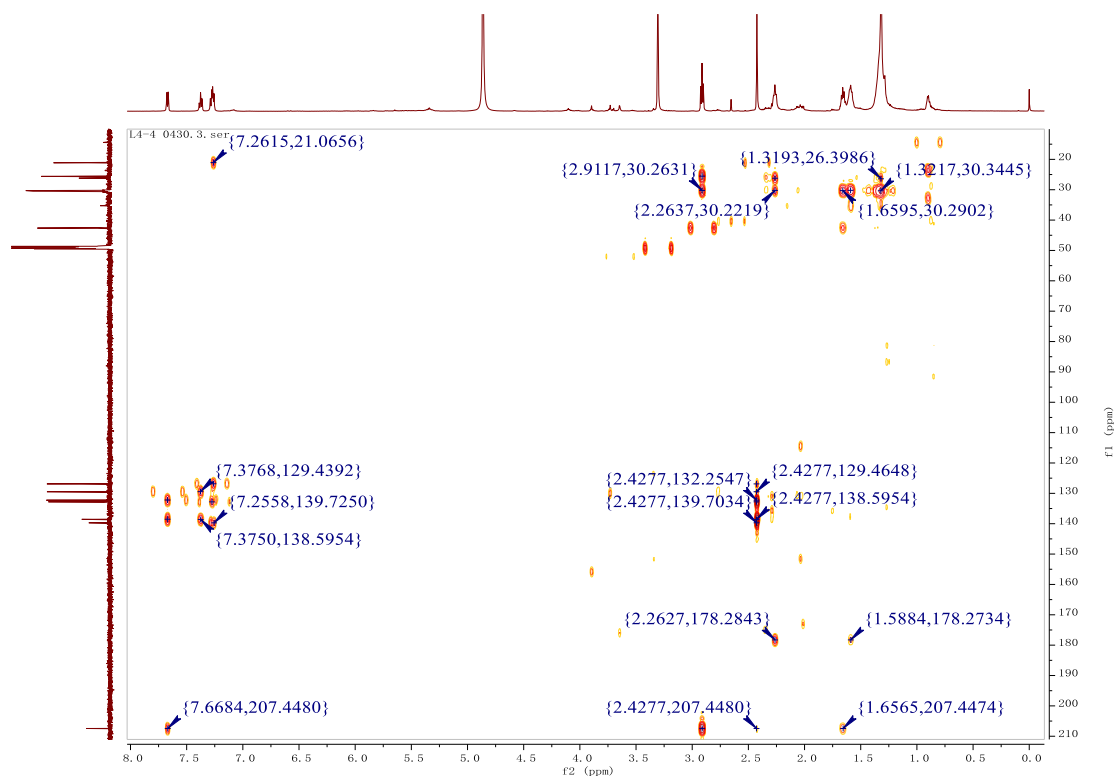

**Figure S13.** HMBC spectrum of compound **2** (CD<sub>3</sub>OD)

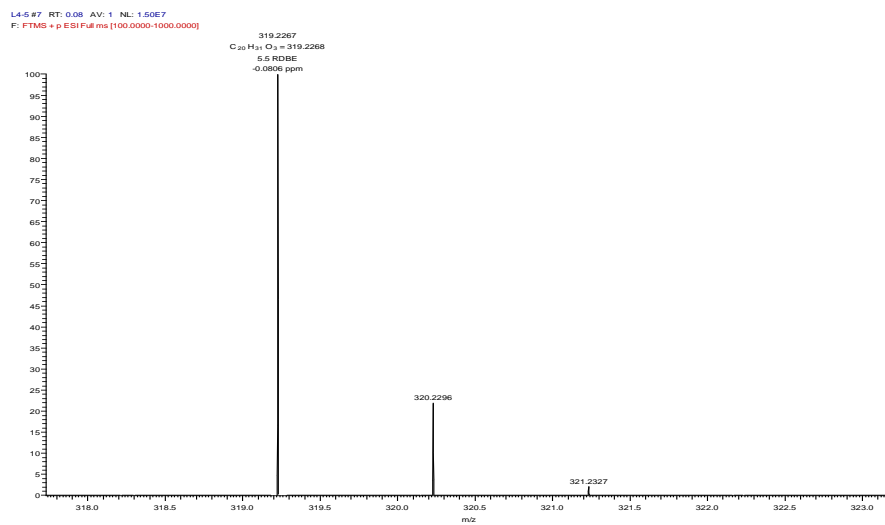

**Figure S14.** HRESIMS spectrum of compound **2**

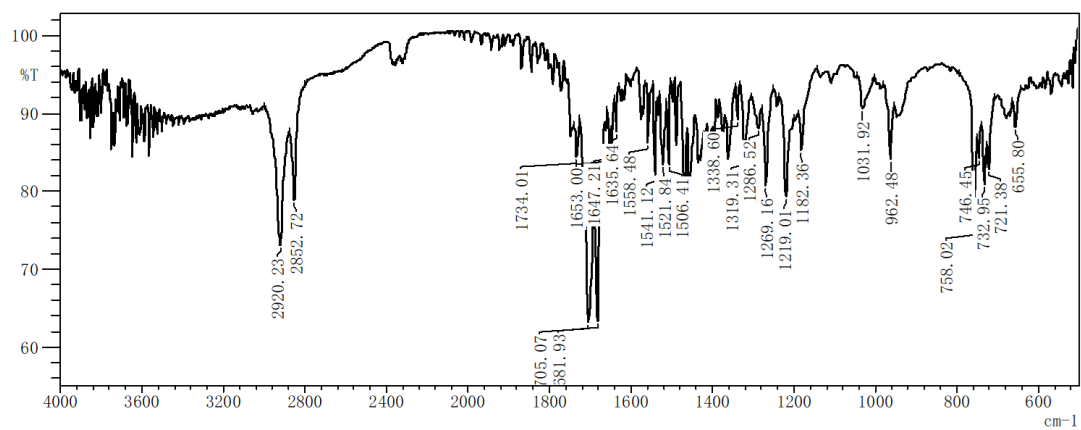

**Figure S15.** IR spectrum of compound **2**

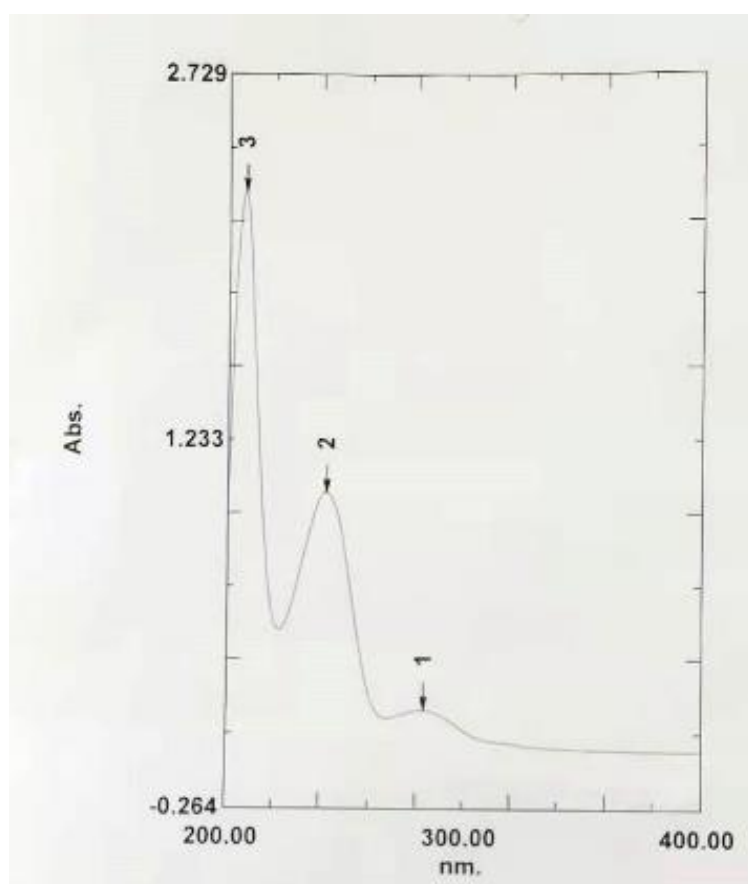

**Figure S16.** UV spectrum of compound **2**

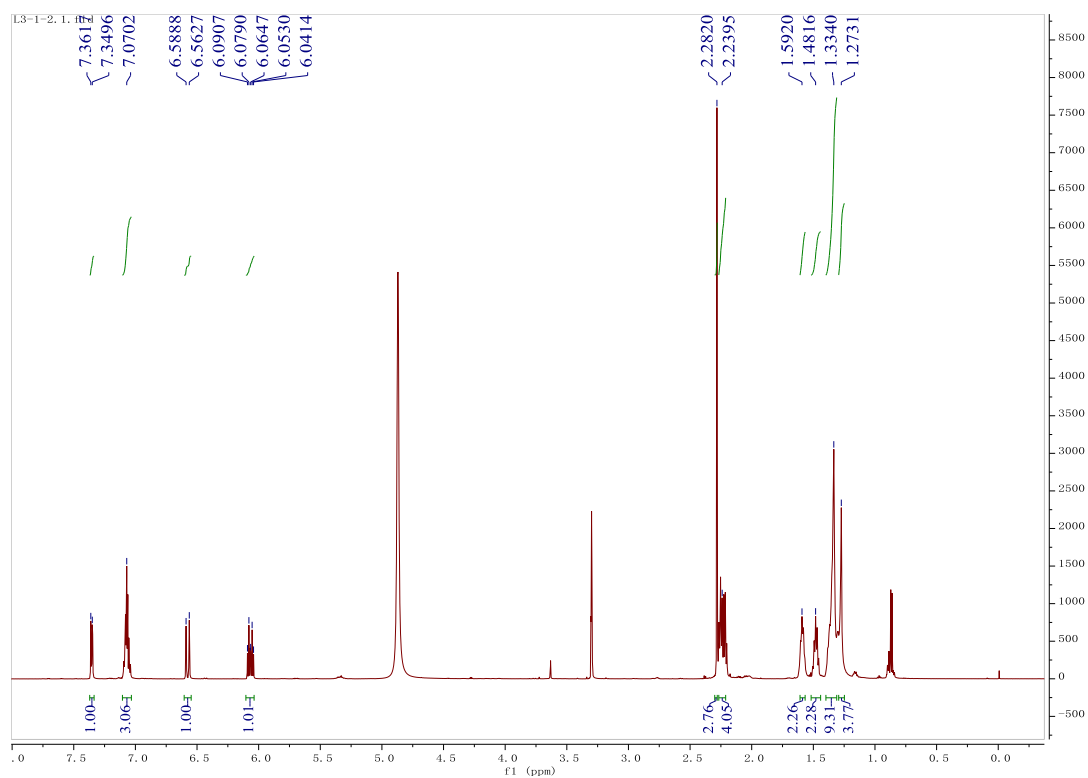

**Figure S17.** <sup>1</sup>H NMR spectrum of compound **3** (CD<sub>3</sub>OD, 600 MHz)

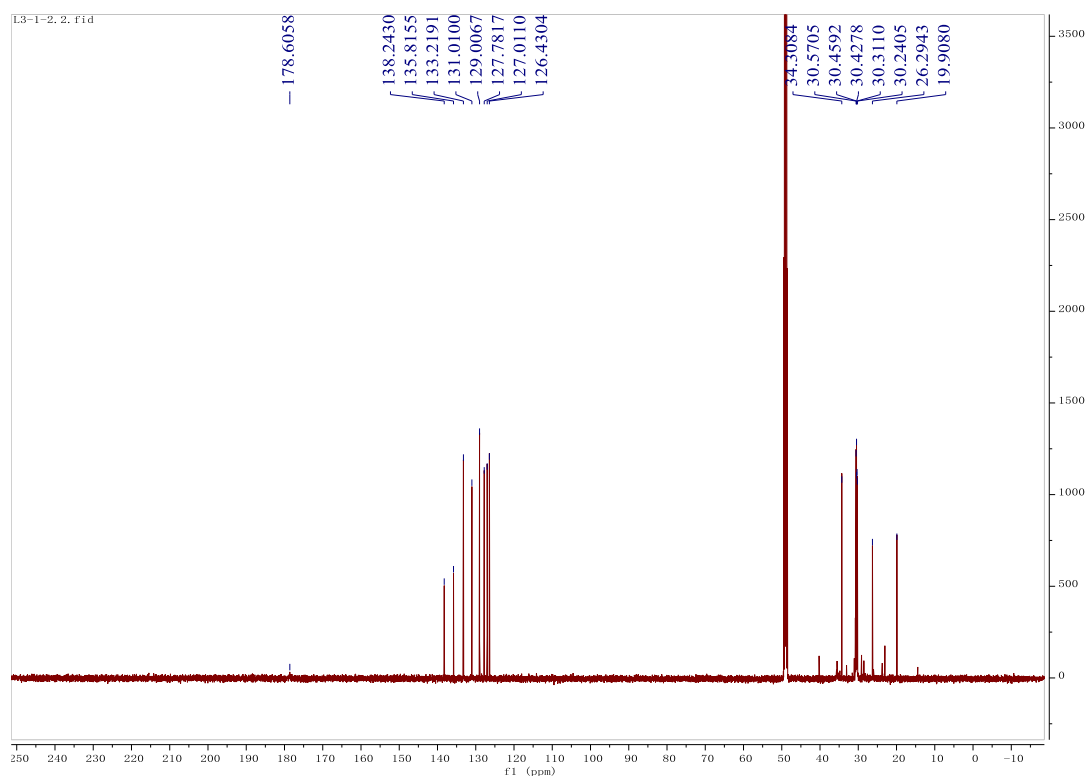

**Figure S18.** <sup>13</sup>C NMR spectrum of compound **3** (CD<sub>3</sub>OD, 150 MHz)

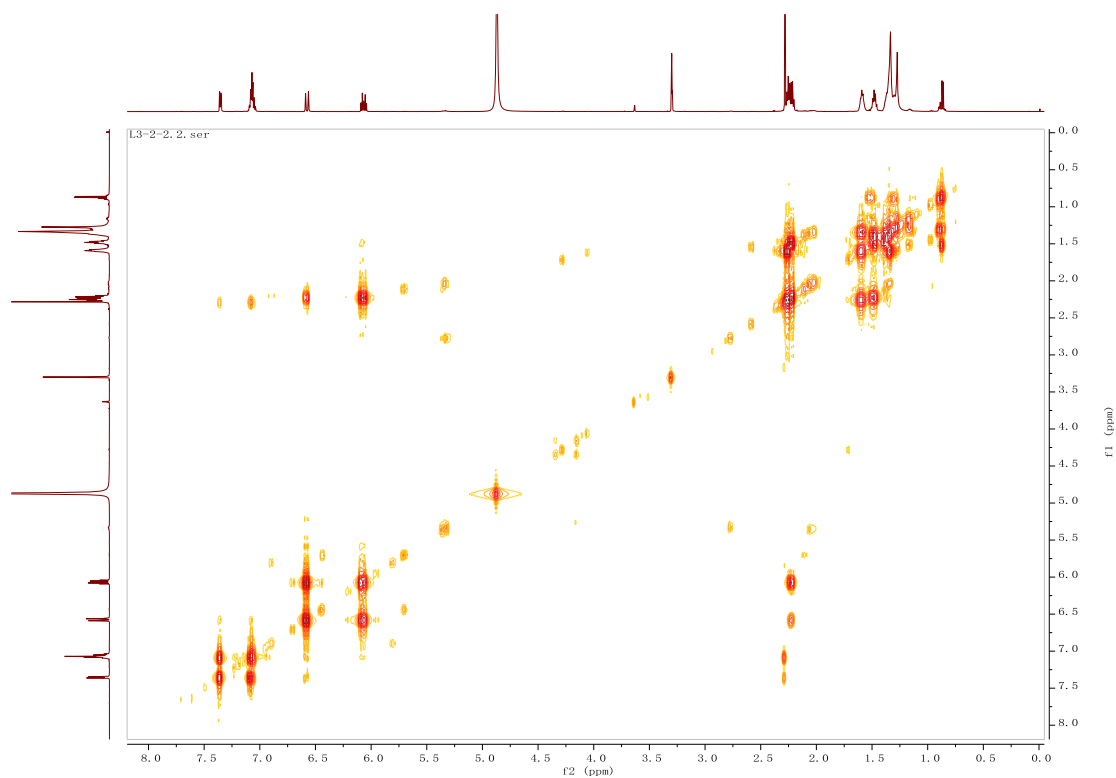

**Figure S19.**  $^1\text{H}$ - $^1\text{H}$  COSY spectrum of compound **3** ( $\text{CD}_3\text{OD}$ )

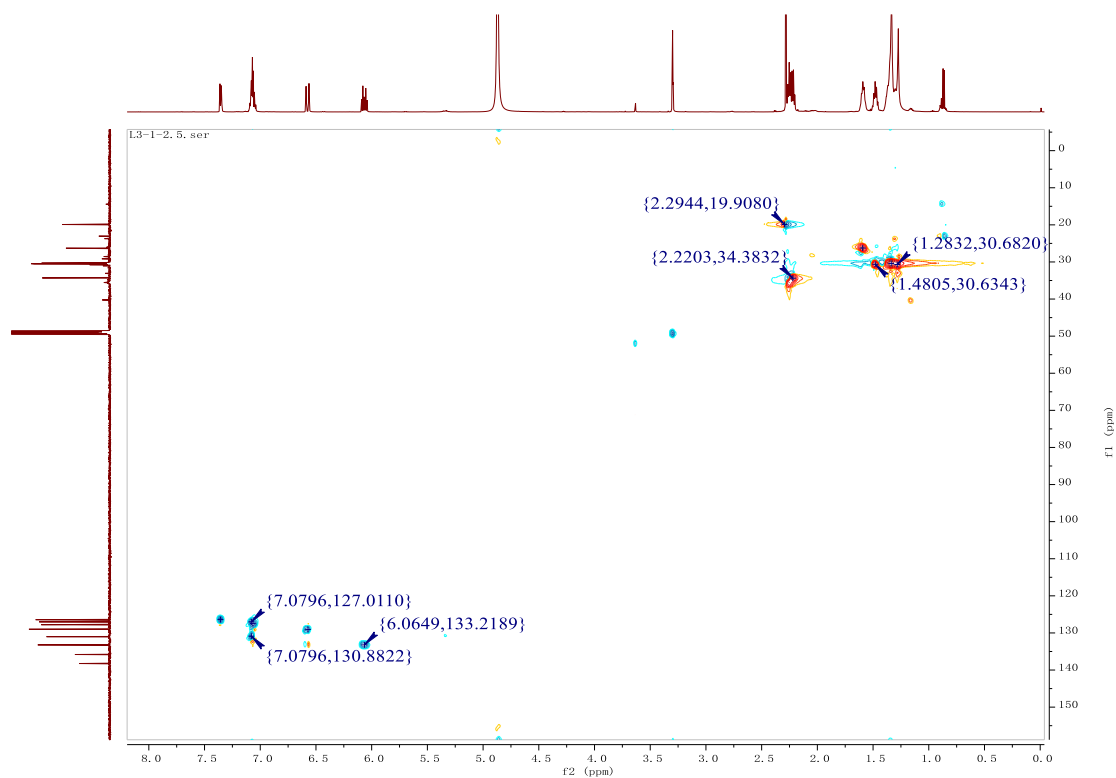

**Figure S20.** HSQC spectrum of compound **3** ( $\text{CD}_3\text{OD}$ )

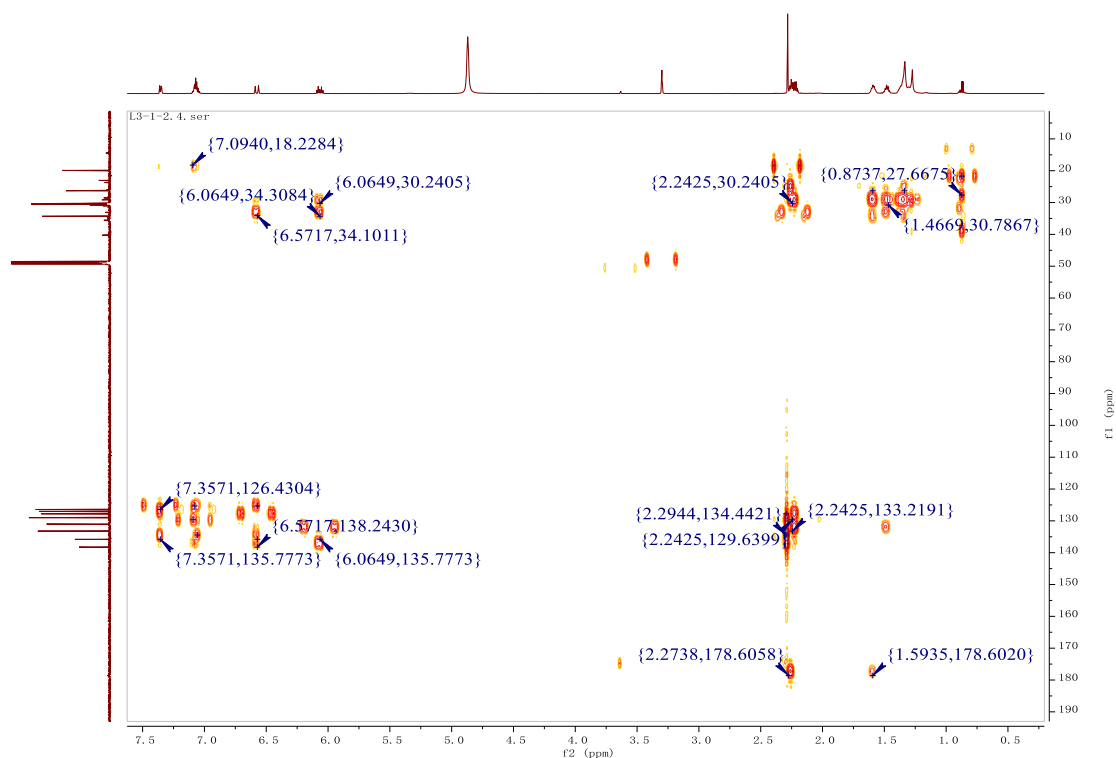

**Figure S21.** HMBC spectrum of compound **3** (CD<sub>3</sub>OD)

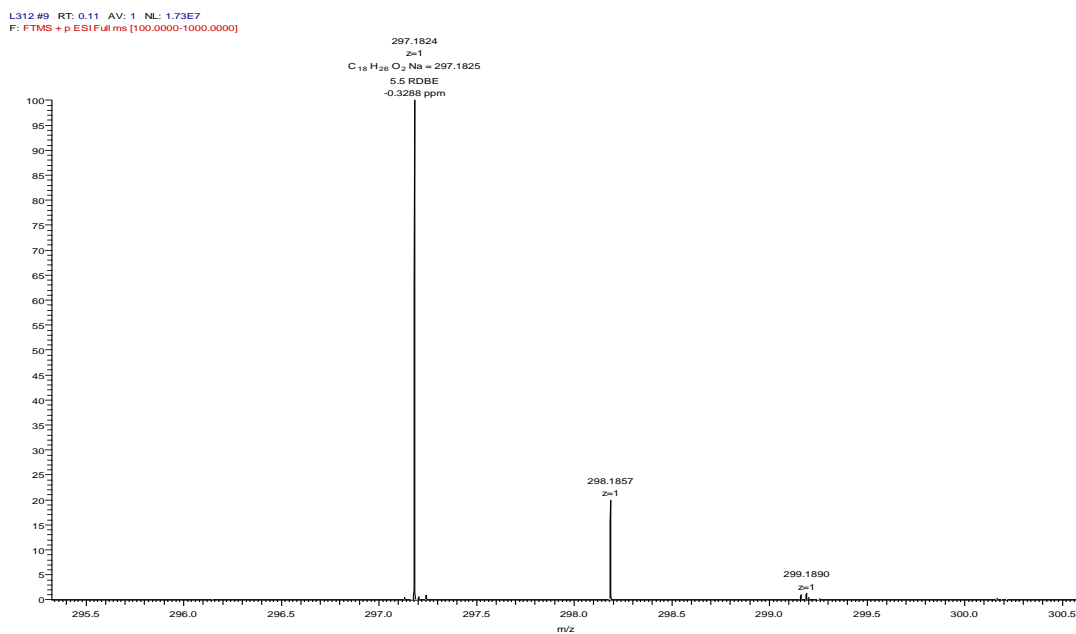

**Figure S22.** HRESIMS spectrum of compound **3**



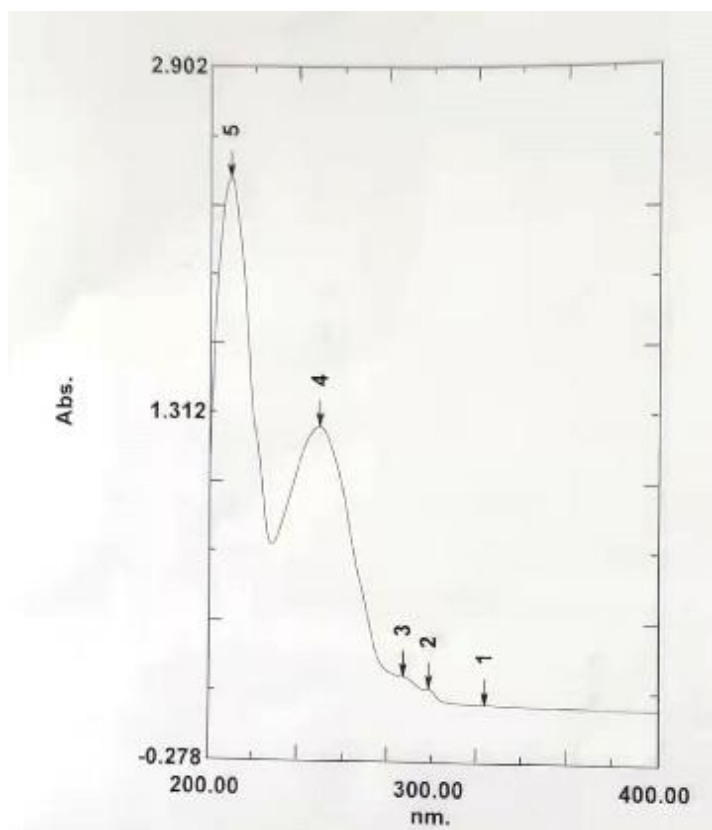

**Figure S23.** UV spectrum of compound **3**

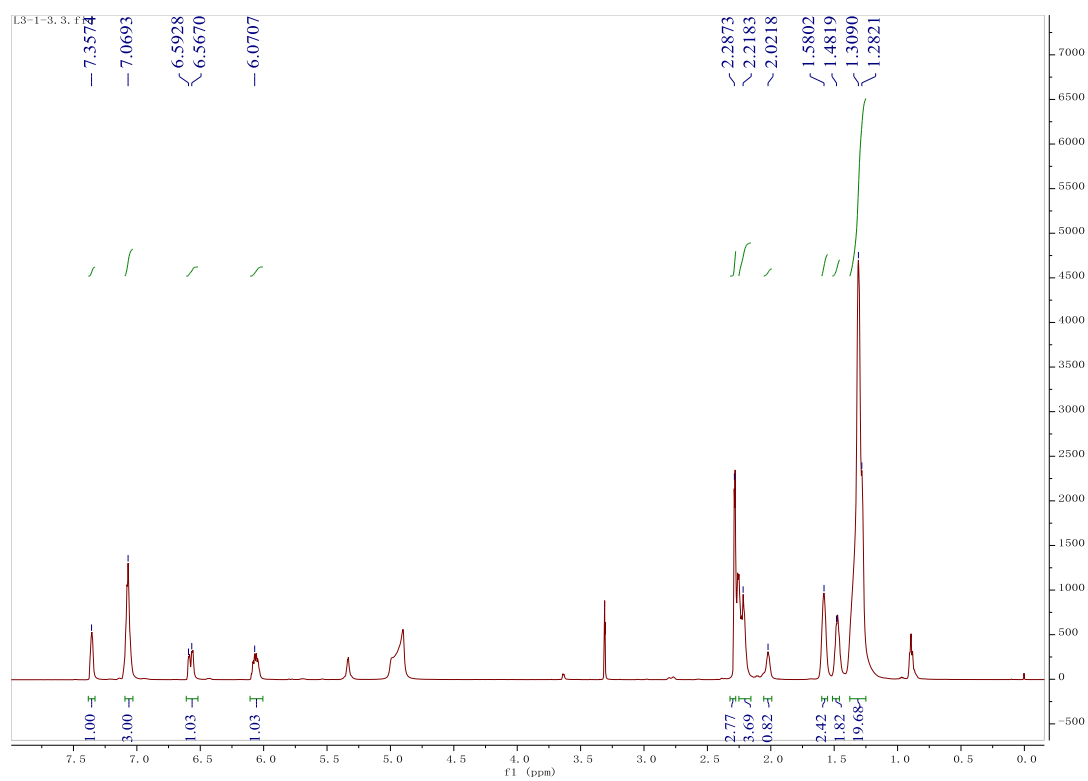

**Figure S24.**  $^1\text{H}$  NMR spectrum of compound **4** ( $\text{CD}_3\text{OD}$ , 600 MHz)

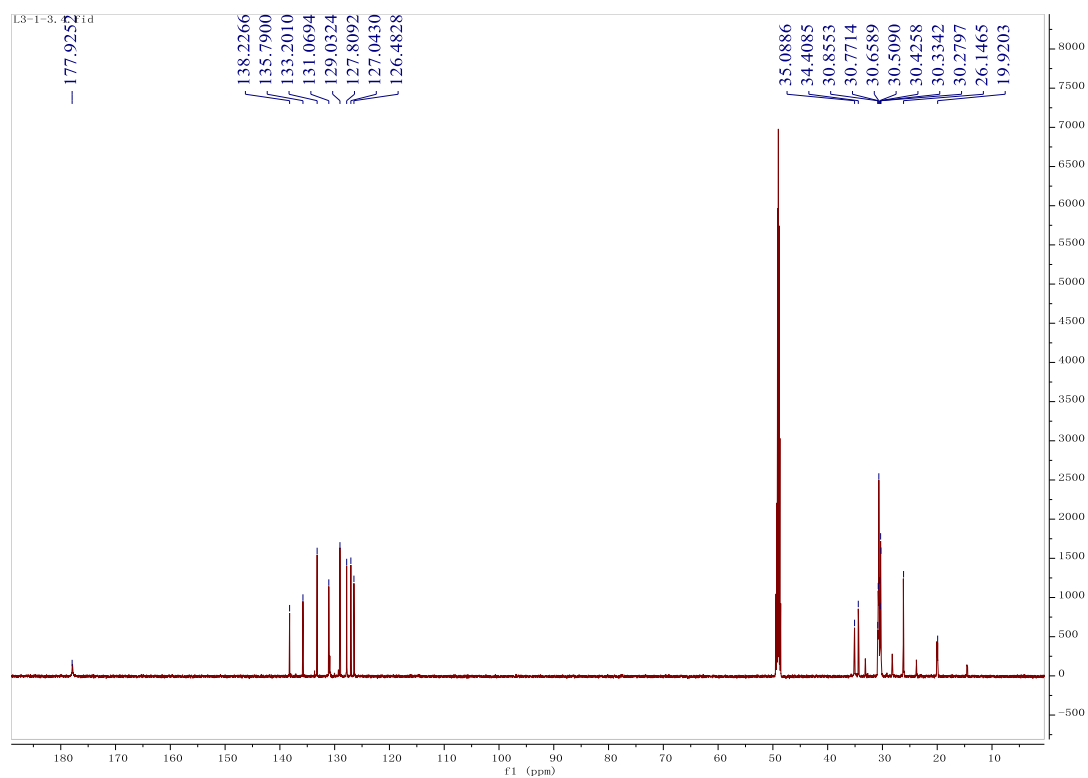

**Figure S25.** <sup>13</sup>C NMR spectrum of compound **4** (CD<sub>3</sub>OD, 150 MHz)

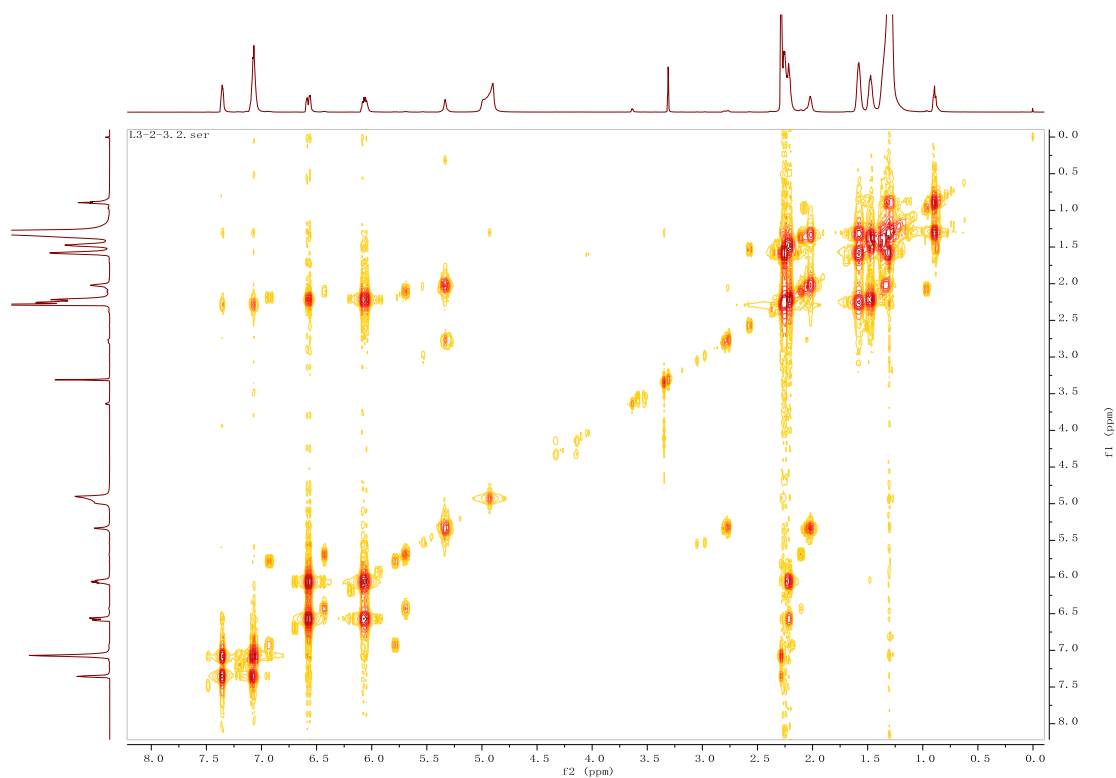

**Figure S26.** <sup>1</sup>H-<sup>1</sup>H COSY spectrum of compound **4** (CD<sub>3</sub>OD)

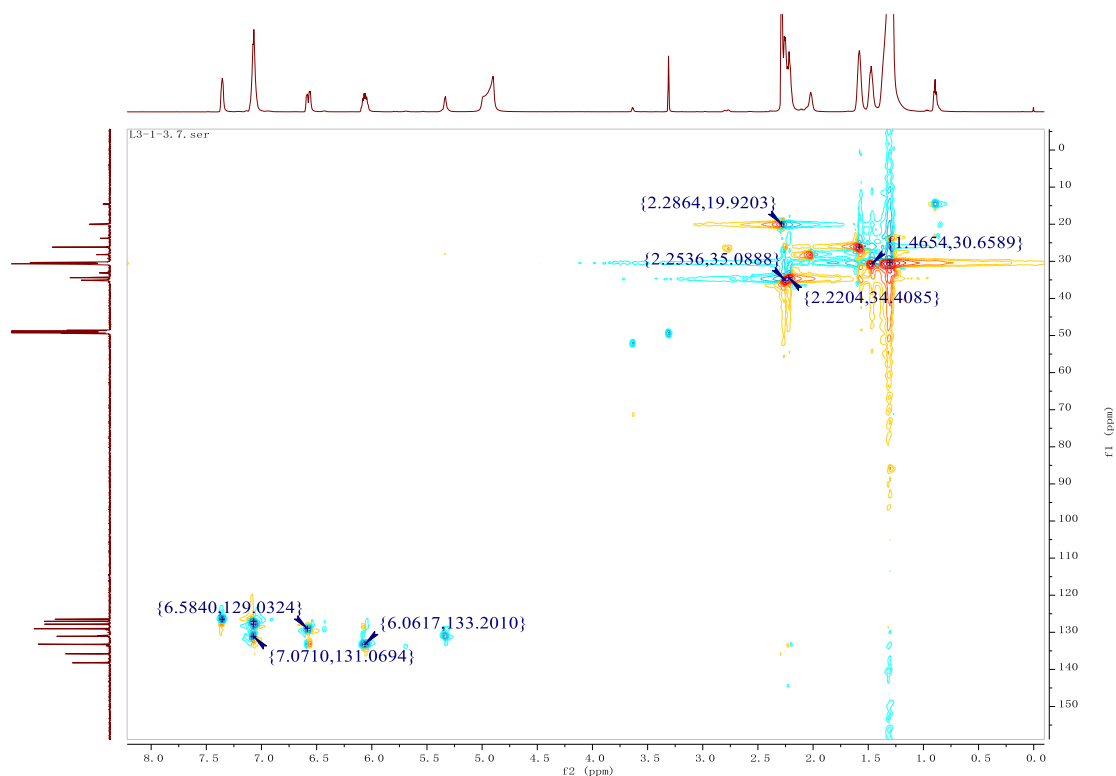

**Figure S27.** HSQC spectrum of compound **4** (CD<sub>3</sub>OD)

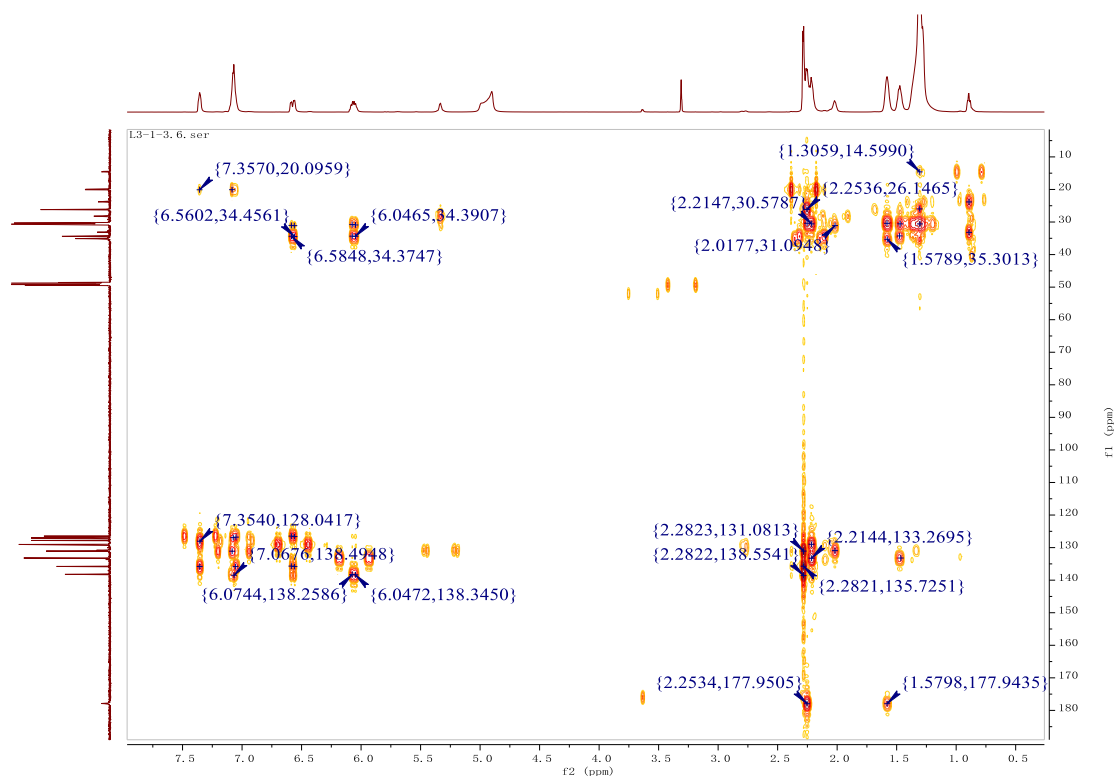

**Figure S28.** HMBC spectrum of compound **4** (CD<sub>3</sub>OD)

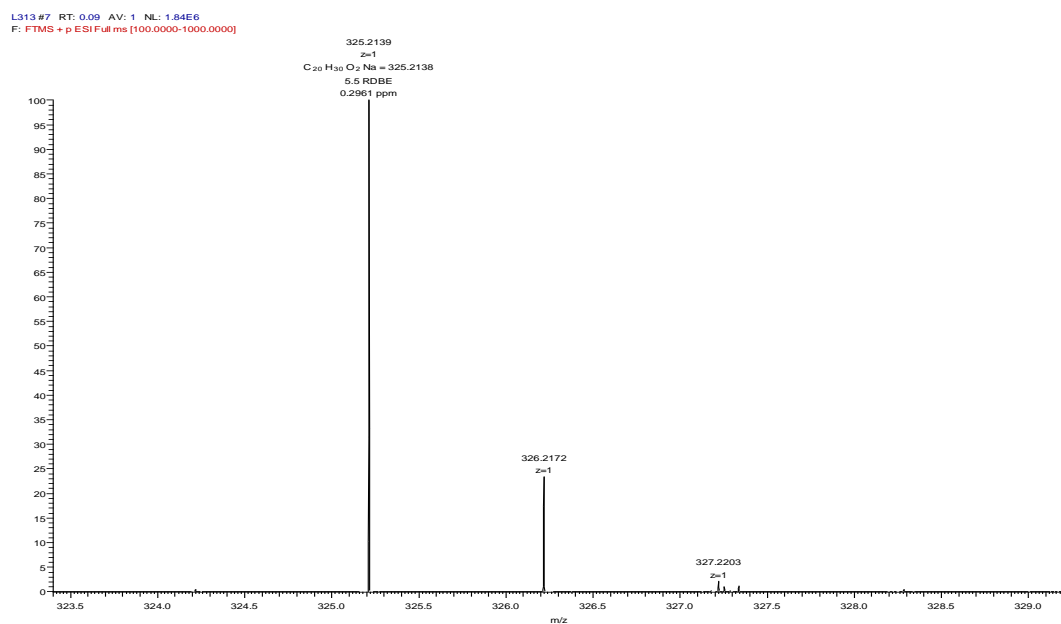

**Figure S29.** HRESIMS spectrum of compound **4**

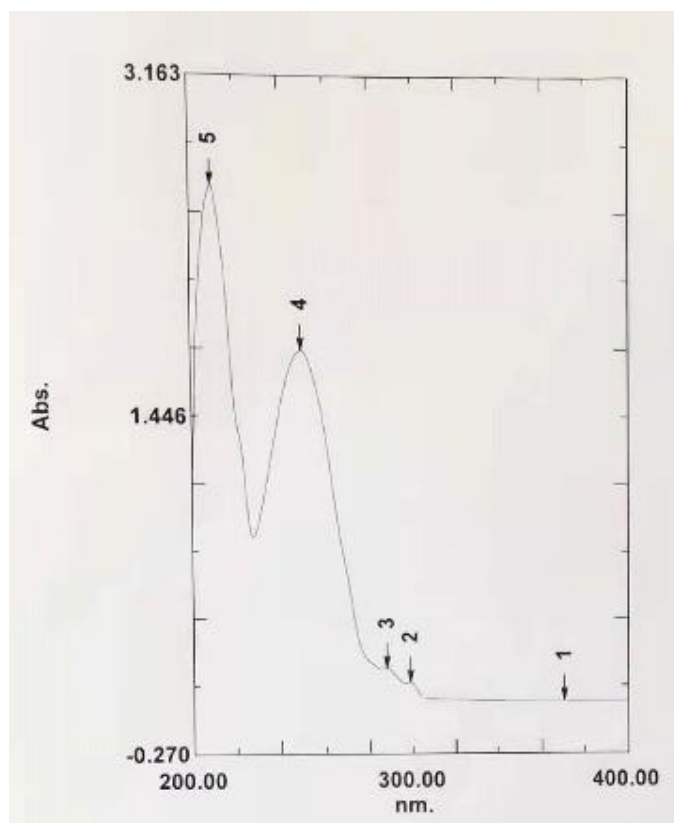

**Figure S30.** UV spectrum of compound **4**

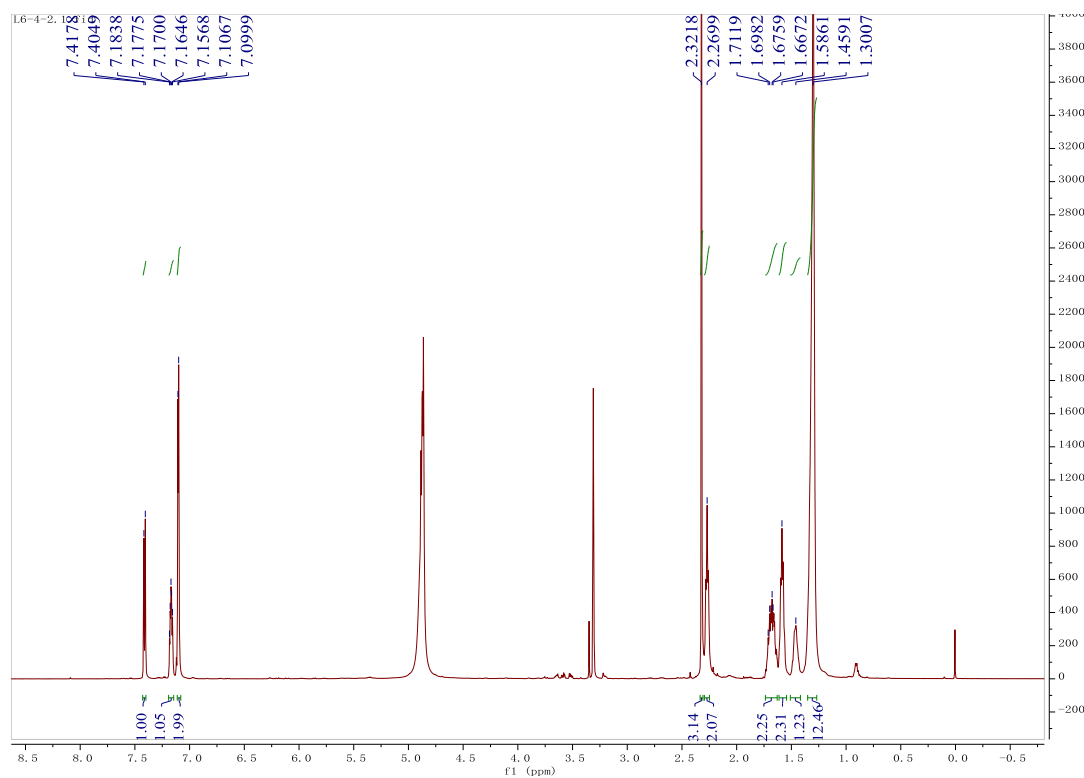

**Figure S31.**  $^1\text{H}$  NMR spectrum of compound **5** ( $\text{CD}_3\text{OD}$ , 600 MHz)

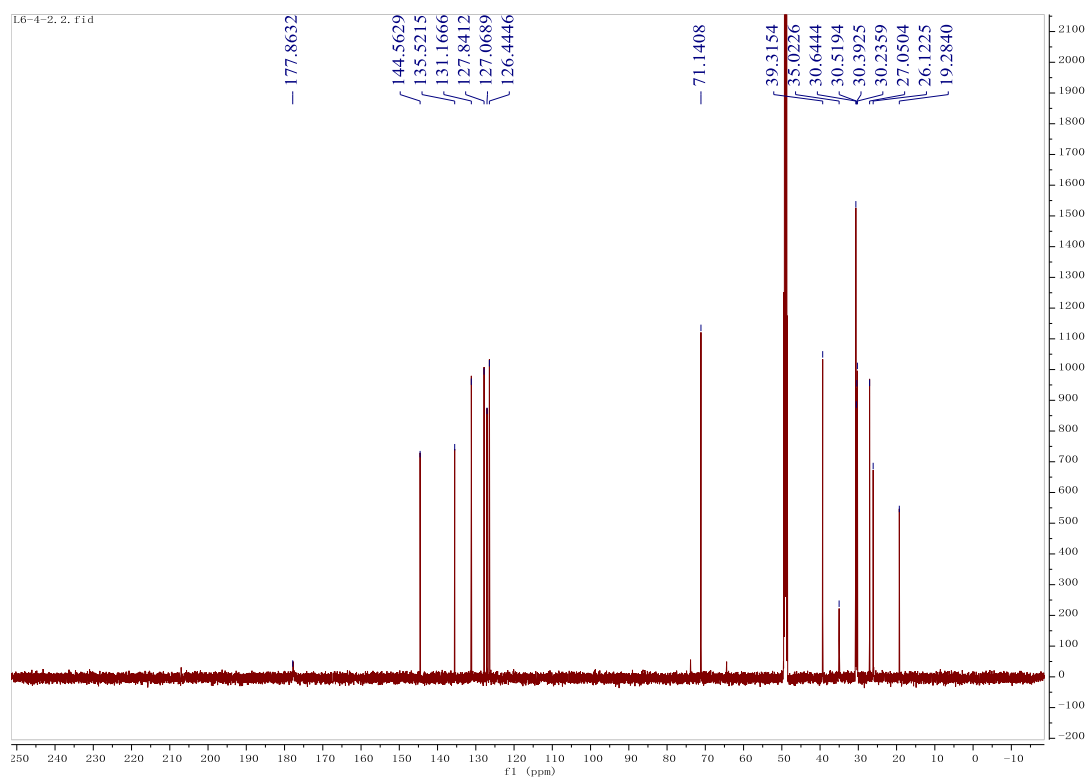

**Figure S32.**  $^{13}\text{C}$  NMR spectrum of compound **5** ( $\text{CD}_3\text{OD}$ , 150 MHz)

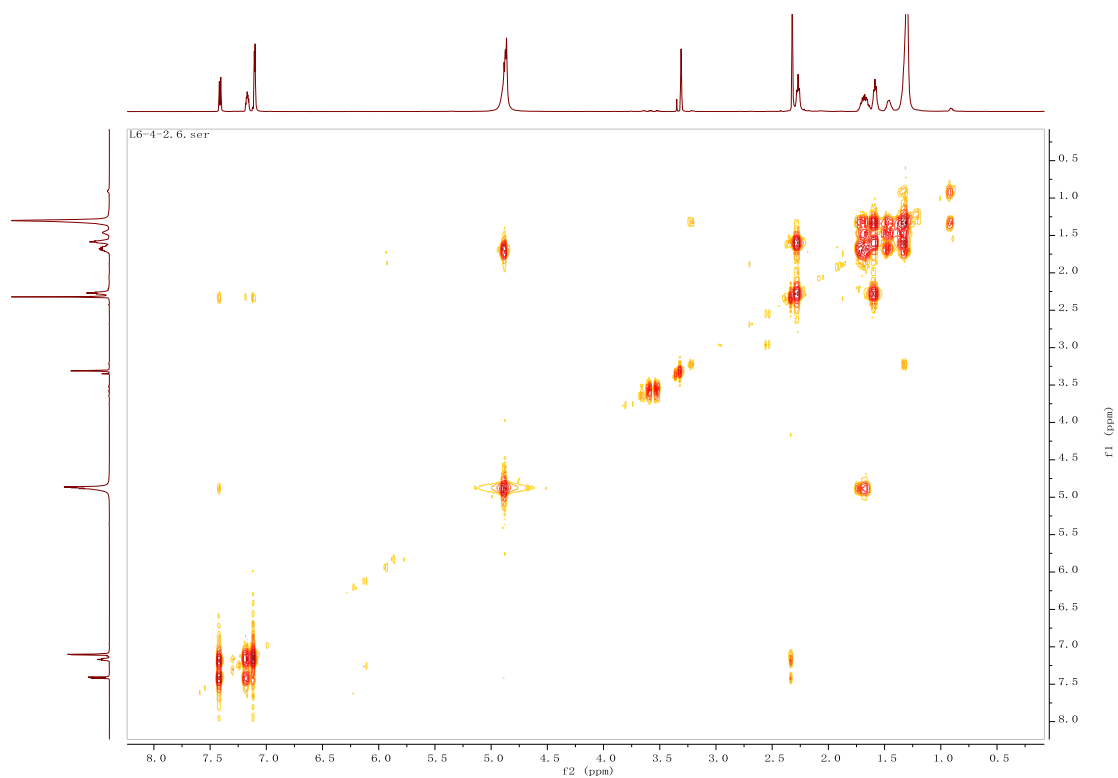

**Figure S33.**  $^1\text{H}$ - $^1\text{H}$  COSY spectrum of compound **5** ( $\text{CD}_3\text{OD}$ )

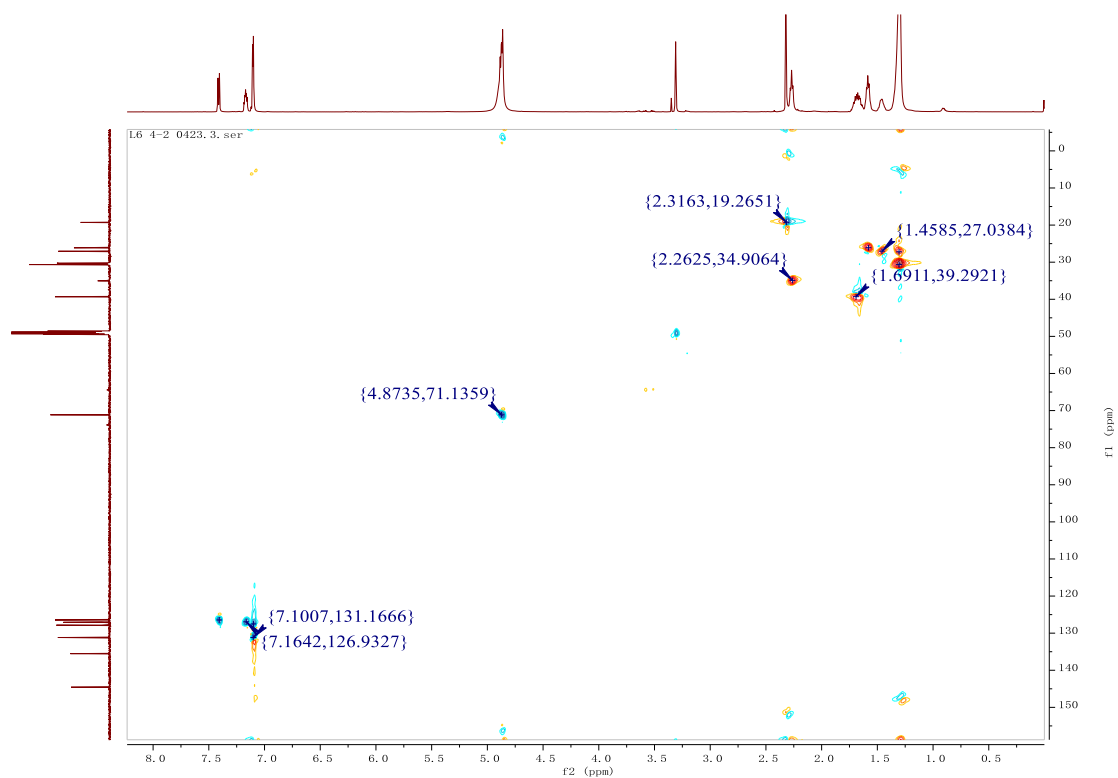

**Figure S34.** HSQC spectrum of compound **5** ( $\text{CD}_3\text{OD}$ )

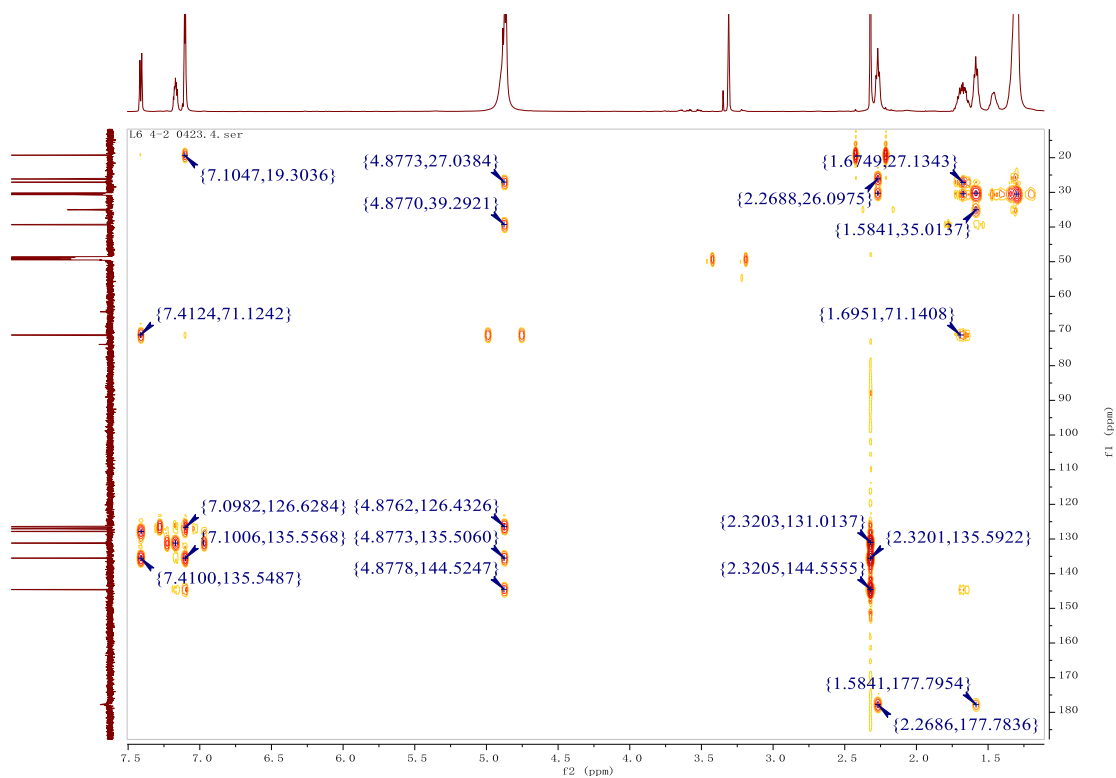

**Figure S35.** HMBC spectrum of compound **5** (CD<sub>3</sub>OD)

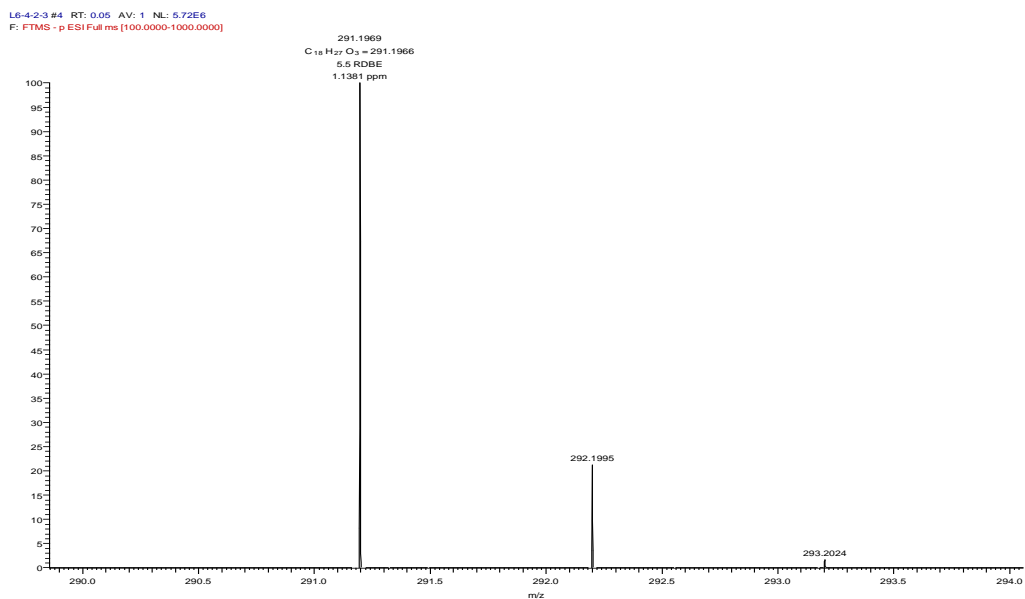

**Figure S36.** HRESIMS spectrum of compound **5**

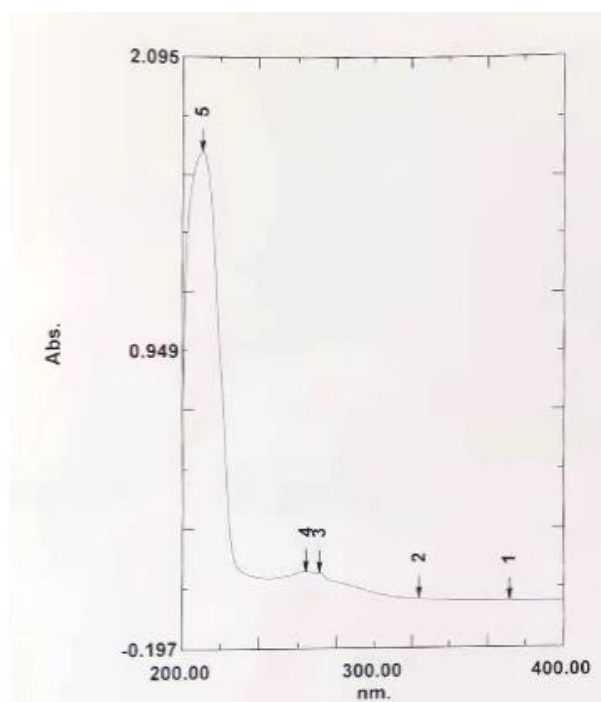

**Figure S37.** UV spectrum of compound **5**

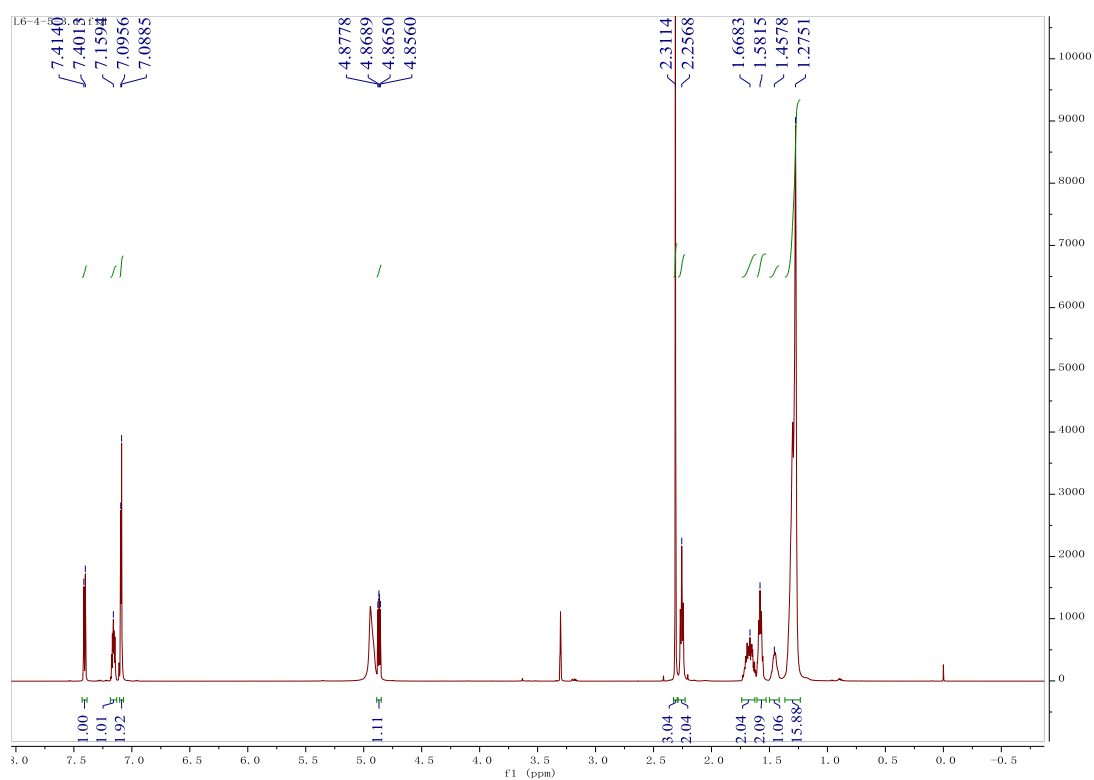

**Figure S38.** <sup>1</sup>H NMR spectrum of compound **6** (CD<sub>3</sub>OD, 600 MHz)



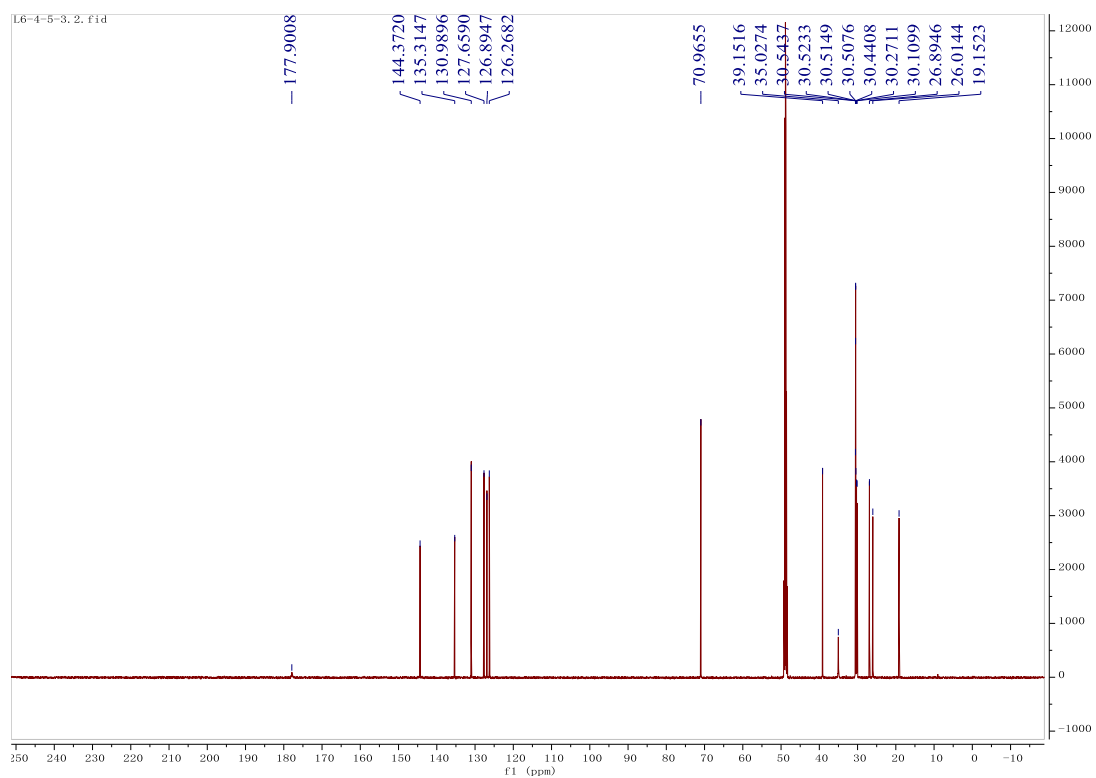

**Figure S39.** <sup>13</sup>C NMR spectrum of compound **6** (CD<sub>3</sub>OD, 150 MHz)

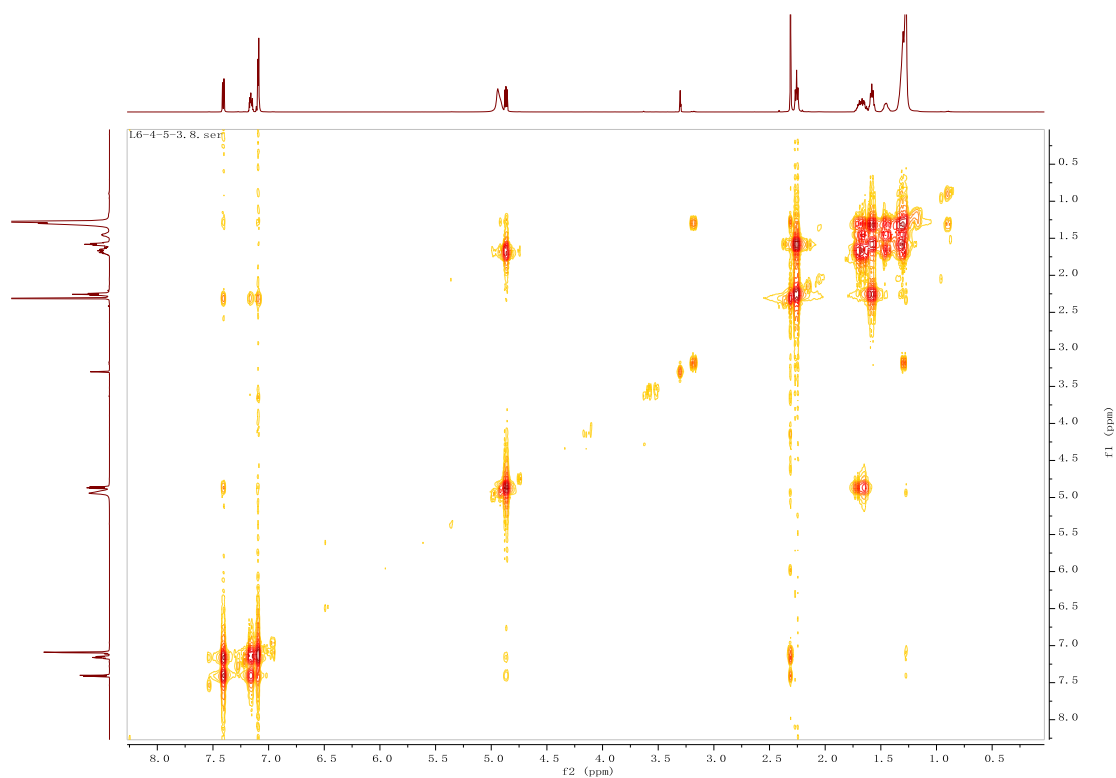

**Figure S40.** <sup>1</sup>H-<sup>1</sup>H COSY spectrum of compound **6** (CD<sub>3</sub>OD)

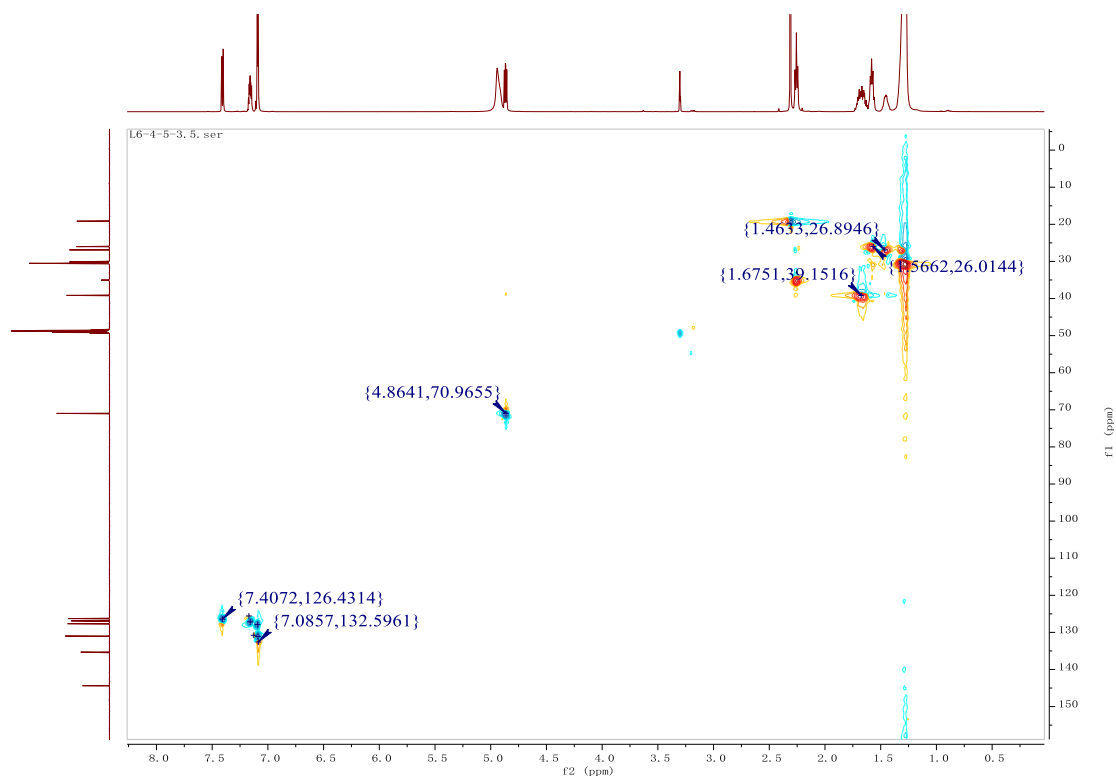

**Figure S41.** HSQC spectrum of compound **6** (CD<sub>3</sub>OD)

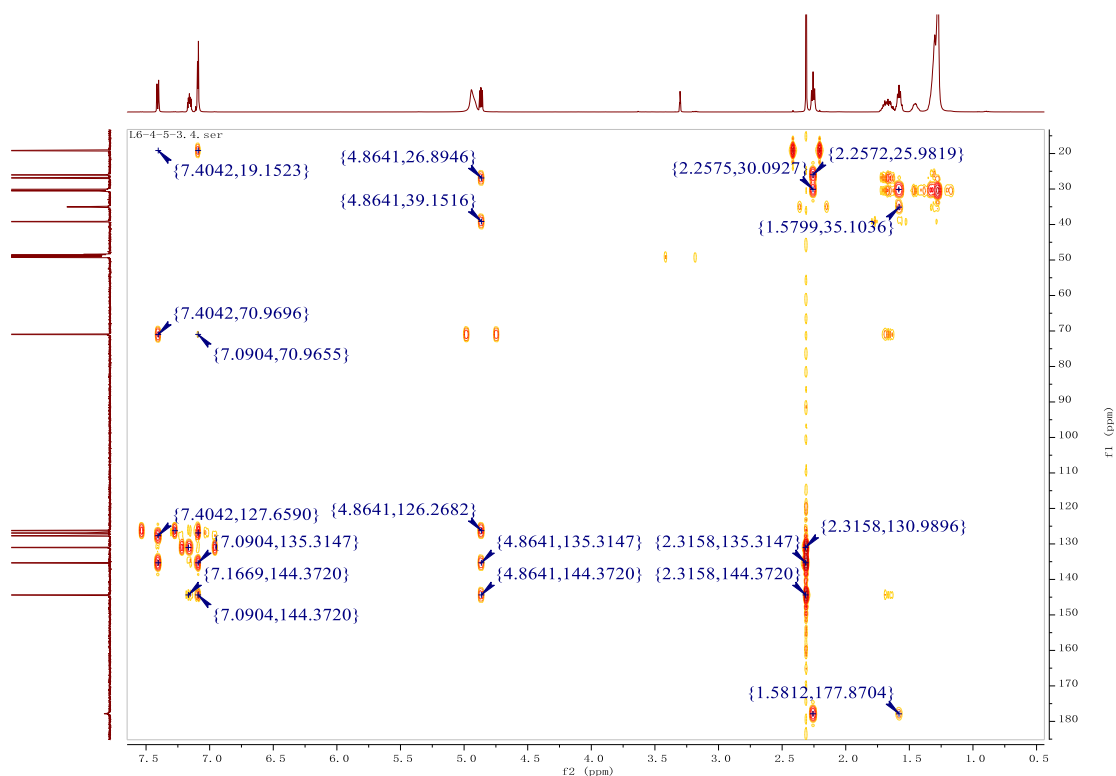

**Figure S42.** HMBC spectrum of compound **6** (CD<sub>3</sub>OD)

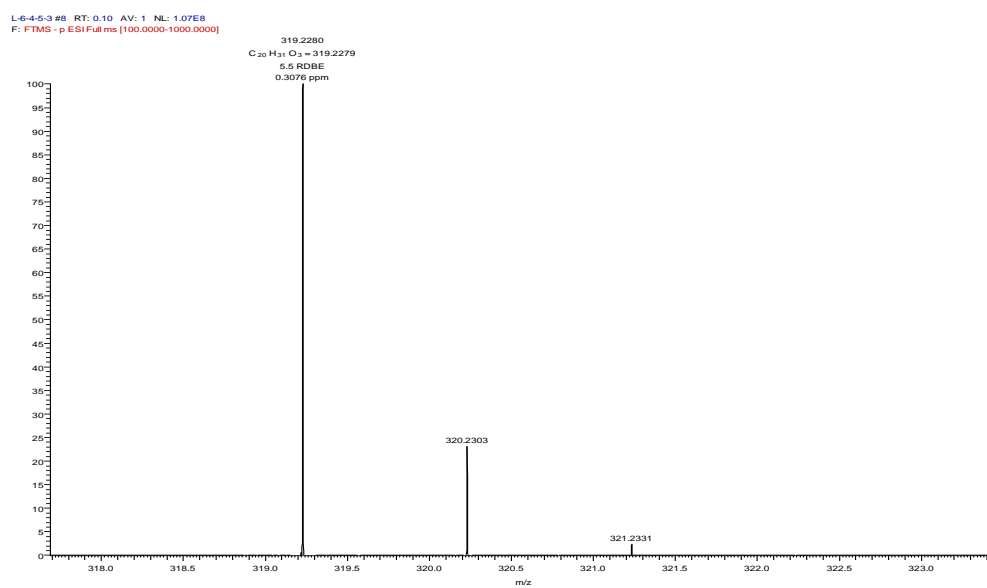

**Figure S43.** HRESIMS spectrum of compound **6**

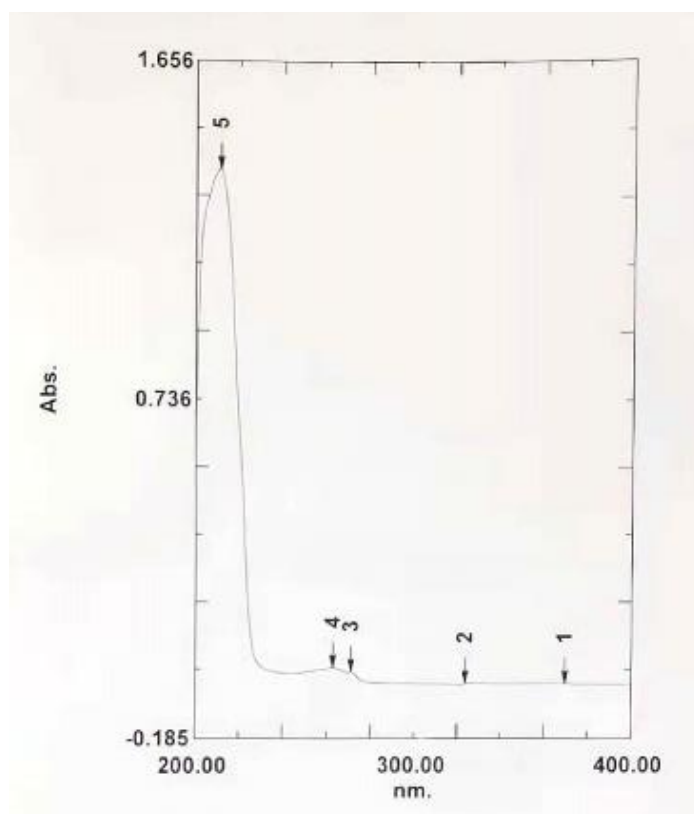

**Figure S44.** UV spectrum of compound **6**

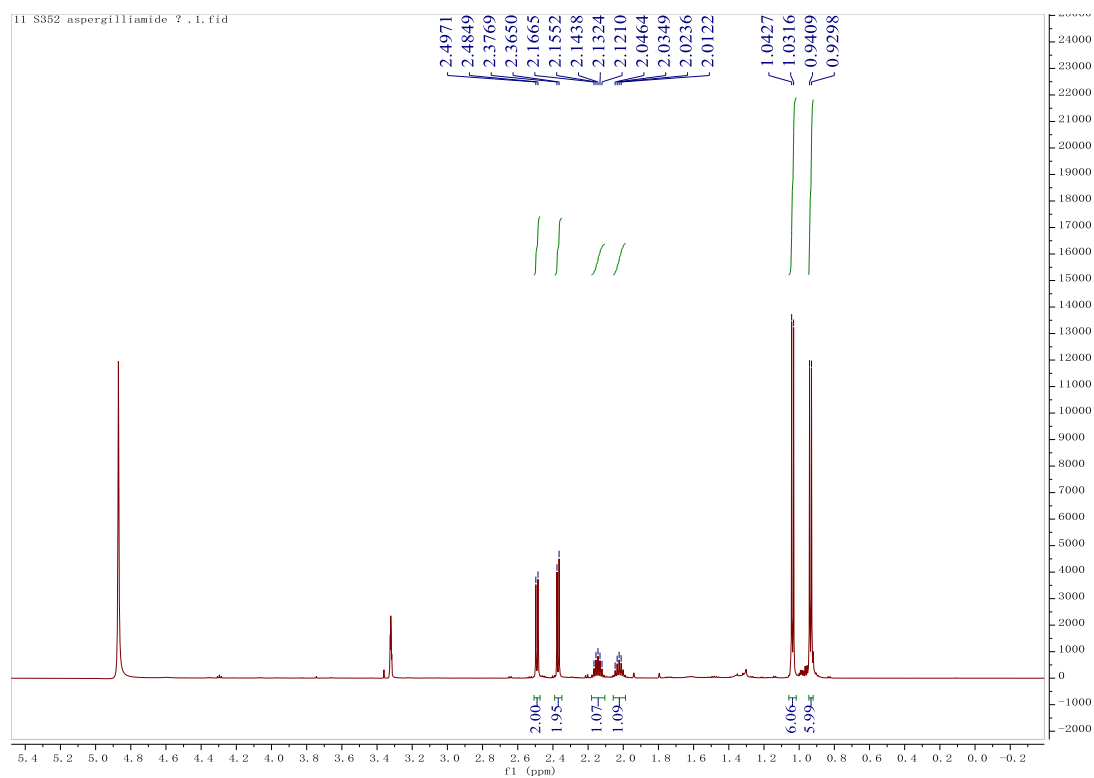

**Figure S45.** <sup>1</sup>H NMR spectrum of compound **7** (CD<sub>3</sub>OD, 600 MHz)

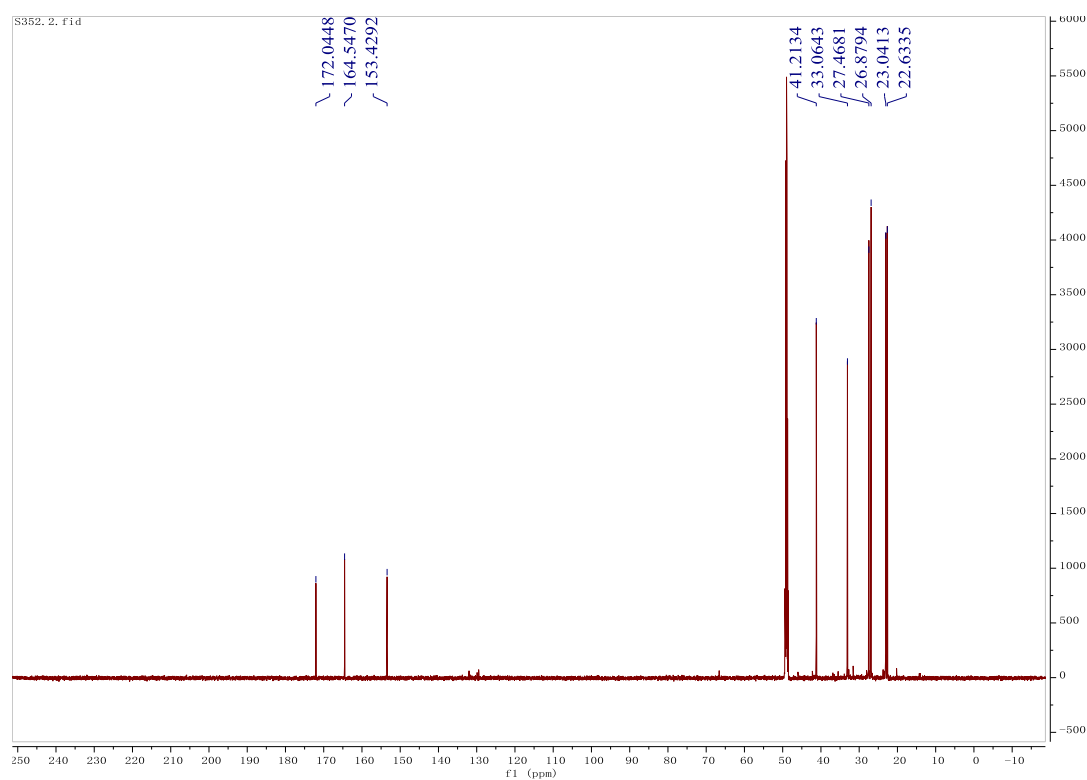

**Figure S46.** <sup>13</sup>C NMR spectrum of compound **7** (CD<sub>3</sub>OD, 150 MHz)

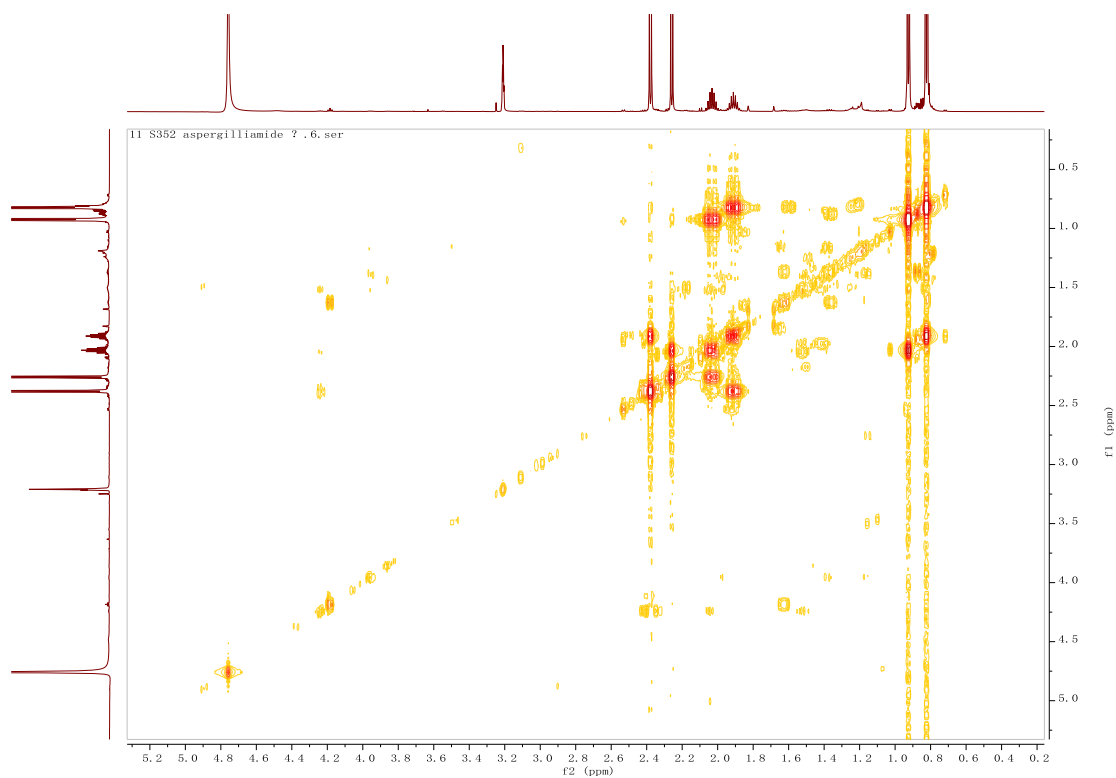

**Figure S47.**  $^1\text{H}$ - $^1\text{H}$  COSY spectrum of compound **7** ( $\text{CD}_3\text{OD}$ )

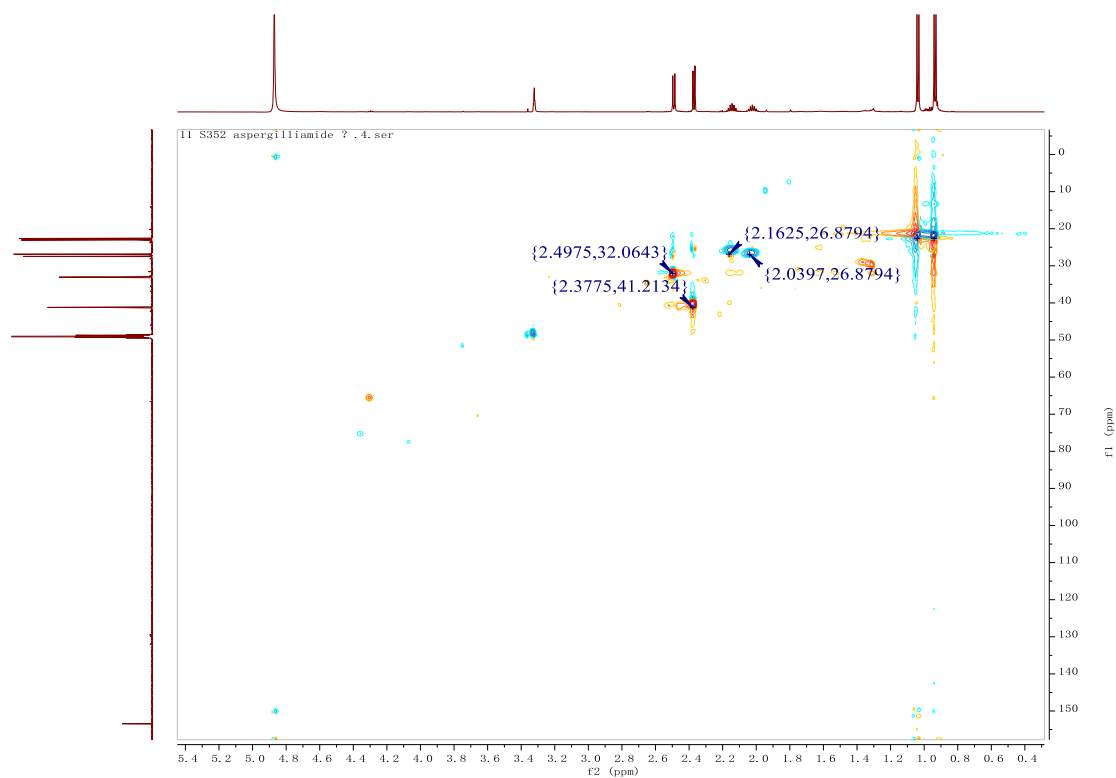

**Figure S48.** HSQC spectrum of compound **7** ( $\text{CD}_3\text{OD}$ )

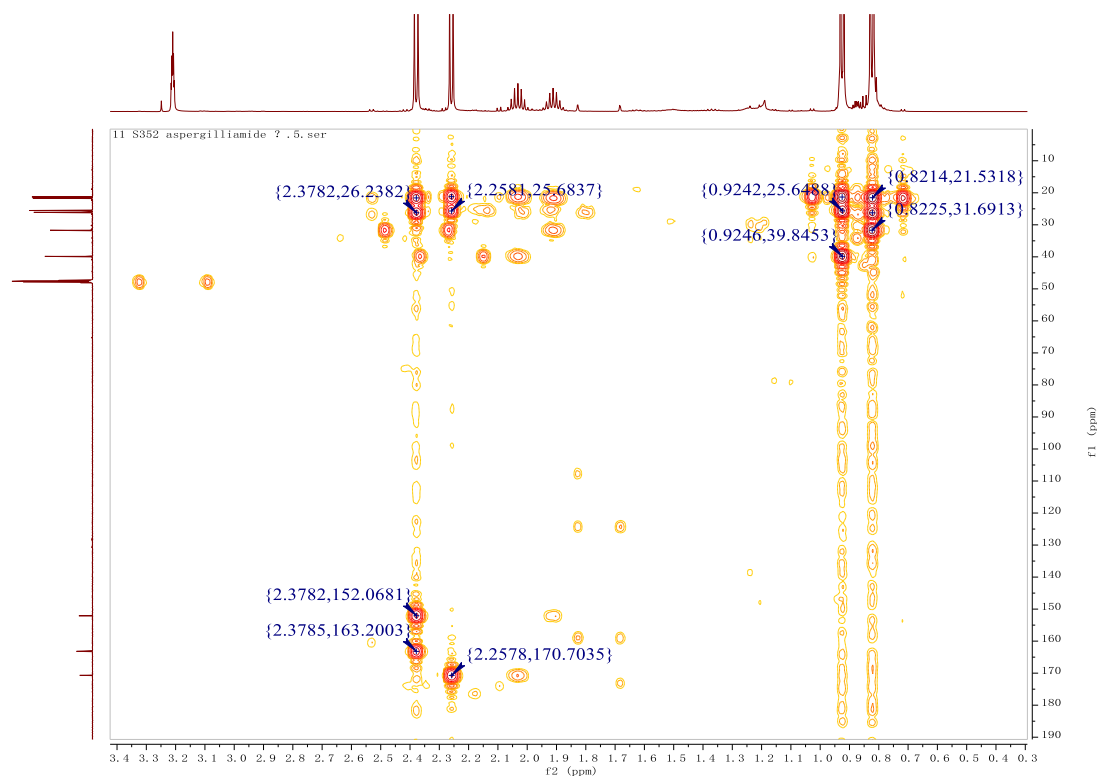

**Figure S49.** HMBC spectrum of compound **7** (CD<sub>3</sub>OD)

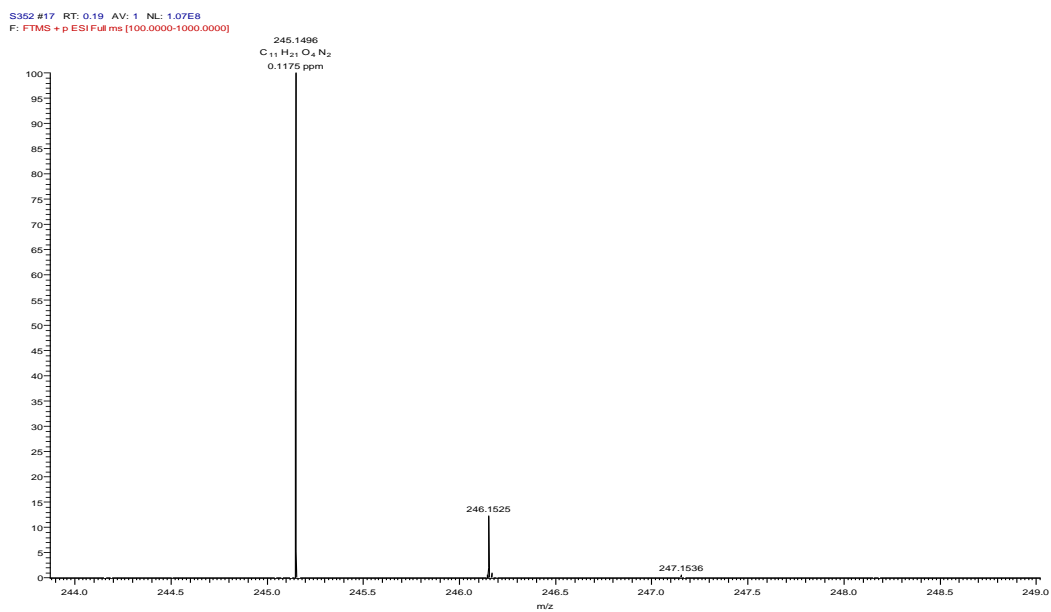

**Figure S50.** HRESIMS spectrum of compound **7**

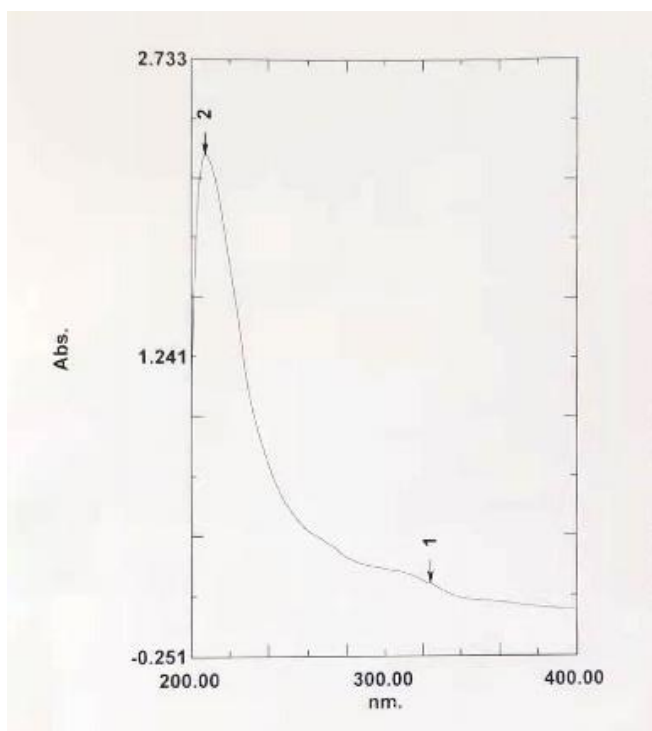

**Figure S51.** UV spectrum of compound **7**

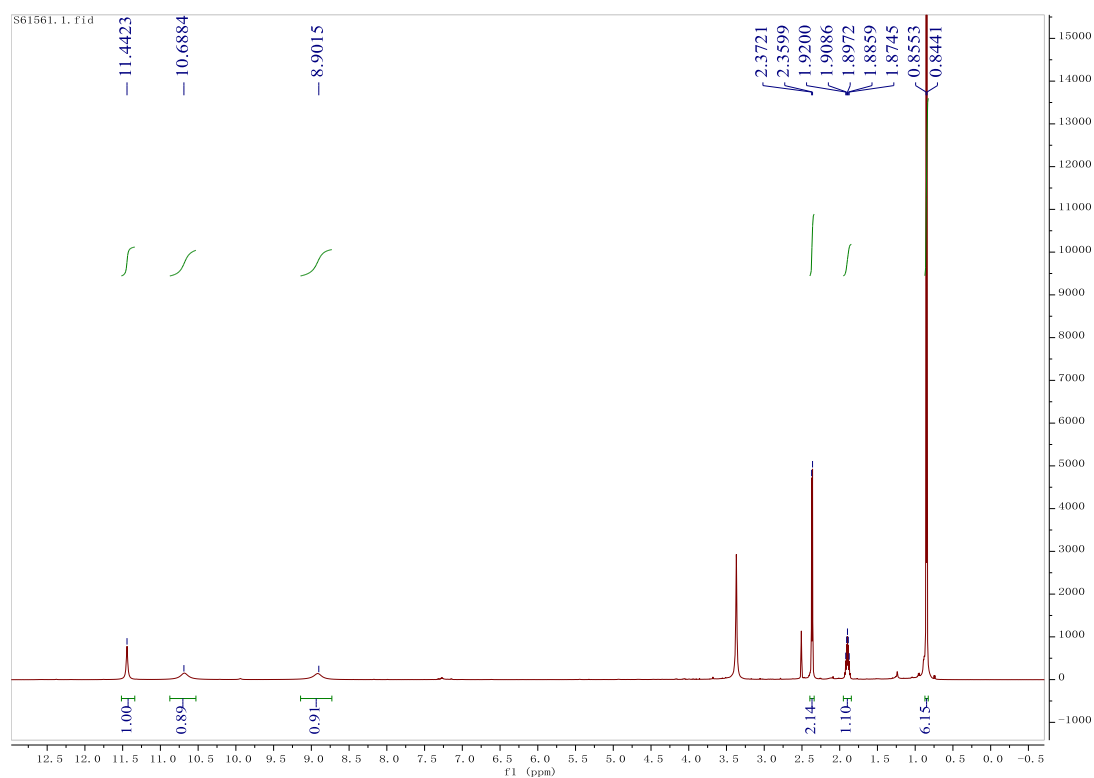

**Figure S52.**  $^1\text{H}$  NMR spectrum of compound **8** (MDSO- $\text{d}_6$ , 600 MHz)

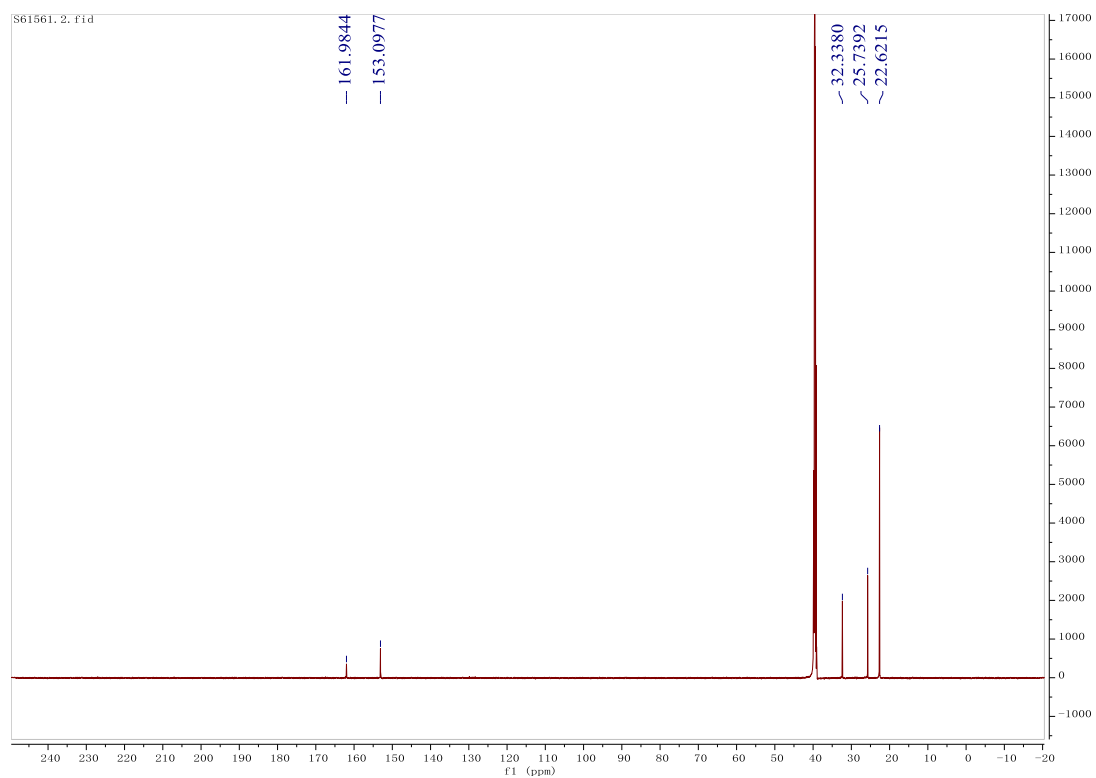

**Figure S53.**  $^{13}\text{C}$  NMR spectrum of compound **8** (MDSO- $\text{d}_6$ , 150 MHz)

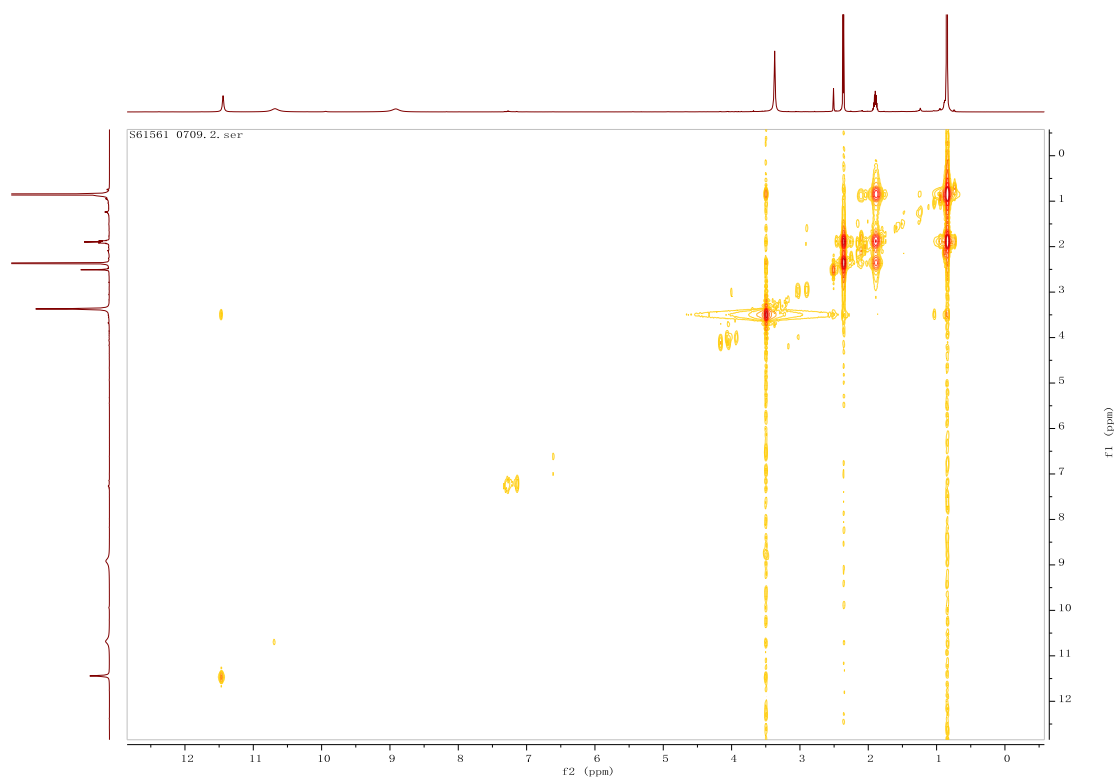

**Figure S54.**  $^1\text{H}$ - $^1\text{H}$  COSY spectrum of compound **8** (MDSO- $\text{d}_6$ )



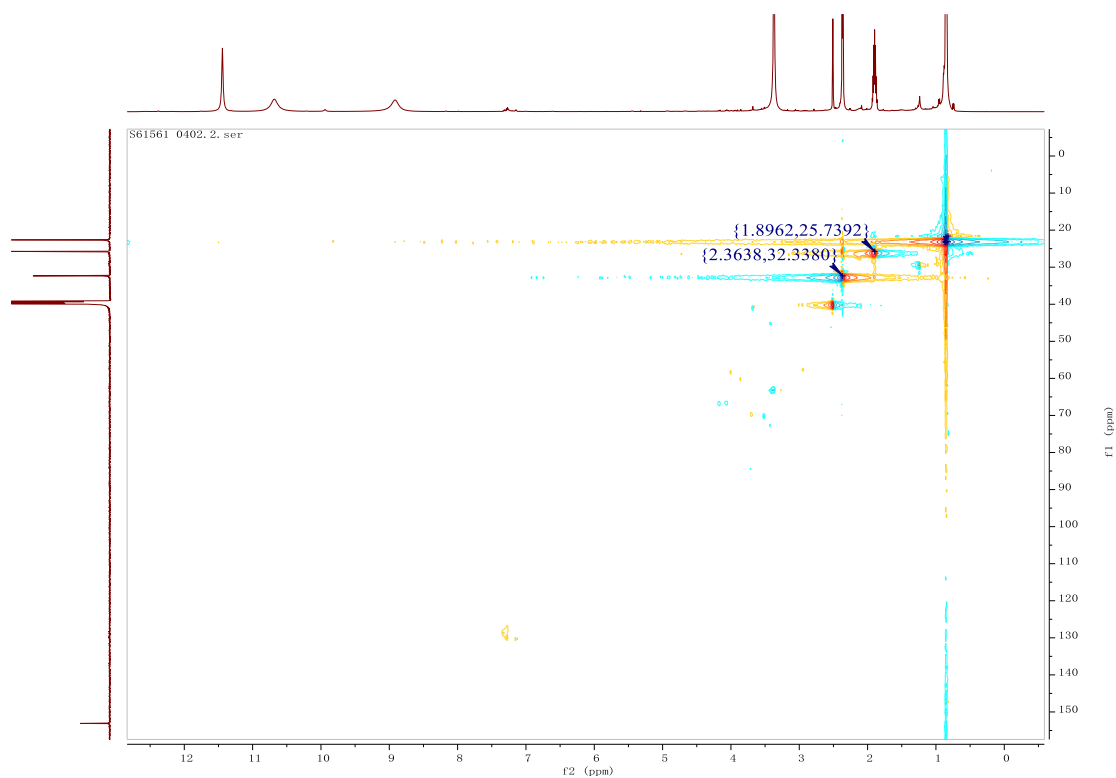

**Figure S55.** HSQC spectrum of compound **8** (MDSO-d<sub>6</sub>)

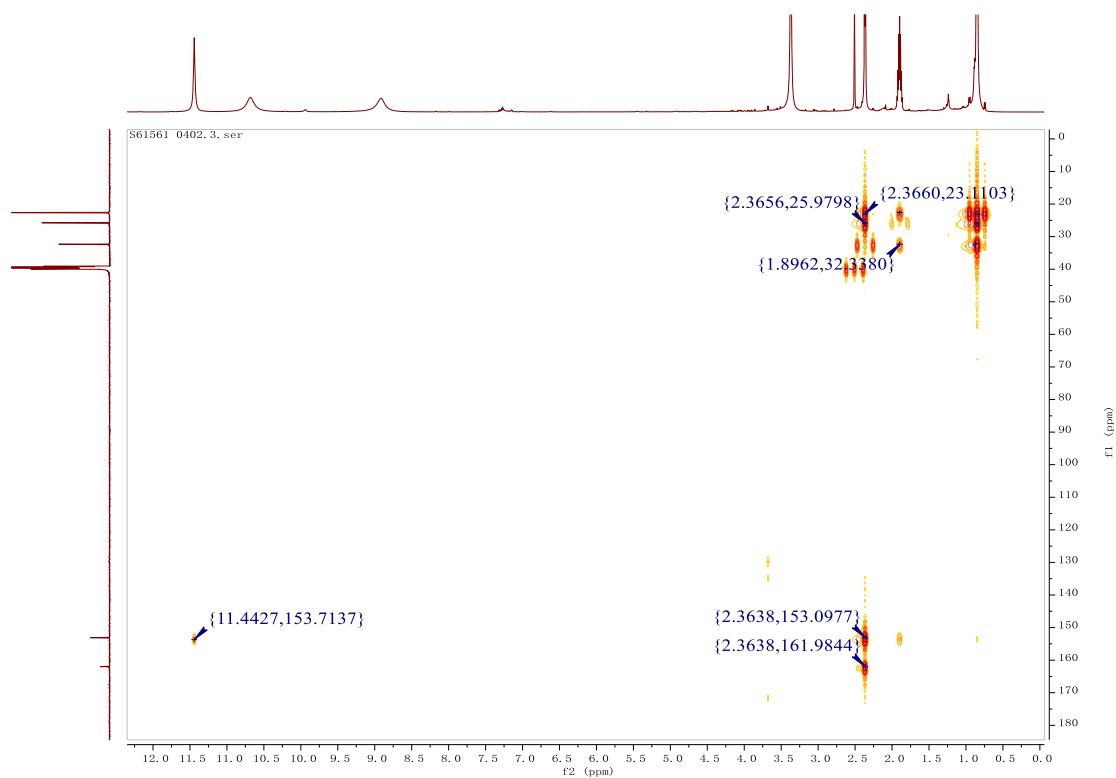

**Figure S56.** HMBC spectrum of compound **8** (MDSO-d<sub>6</sub>)

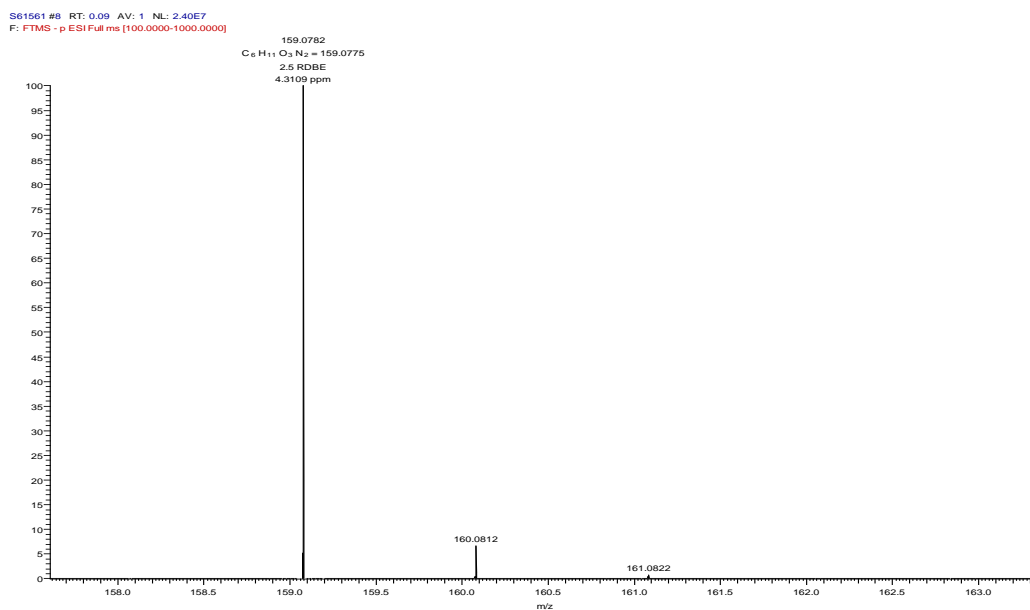

**Figure S57.** HRESIMS spectrum of compound **8**

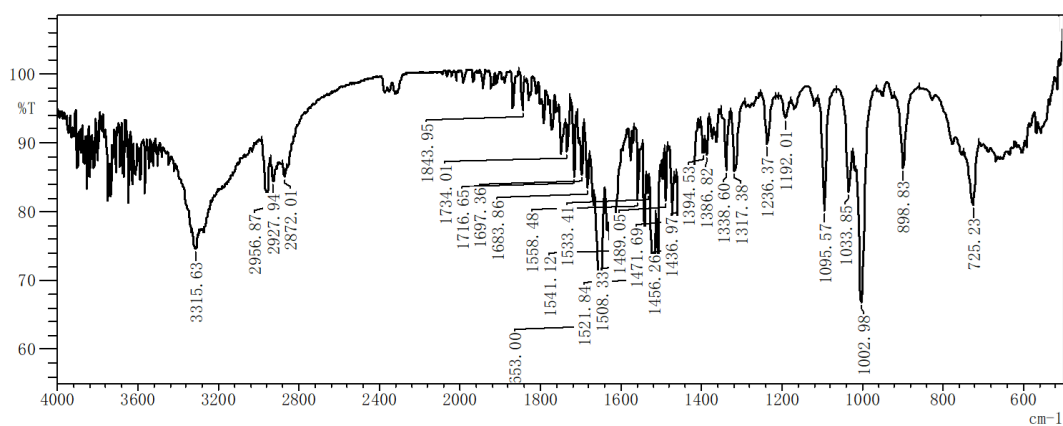

**Figure S58.** IR spectrum of compound **8**

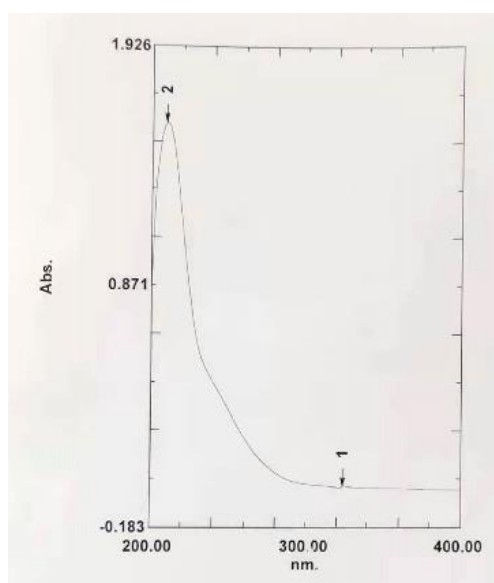

**Figure S59.** UV spectrum of compound **8**

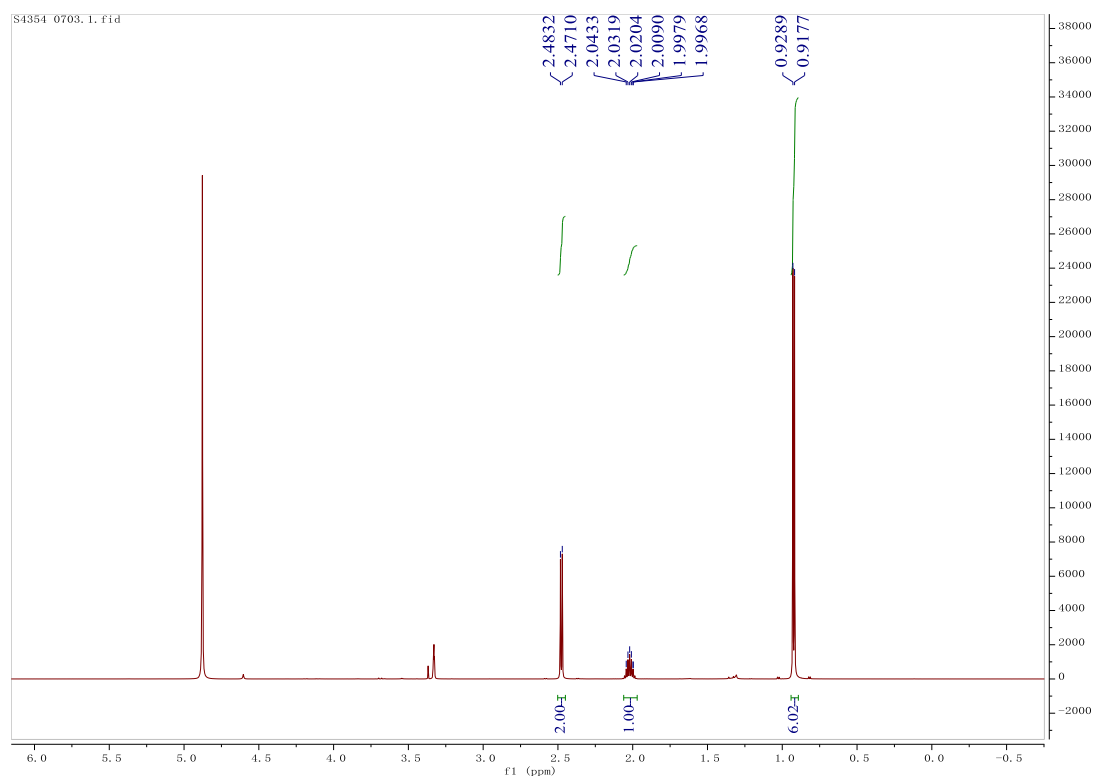

**Figure S60.** <sup>1</sup>H NMR spectrum of compound **9** (CD<sub>3</sub>OD, 600 MHz)

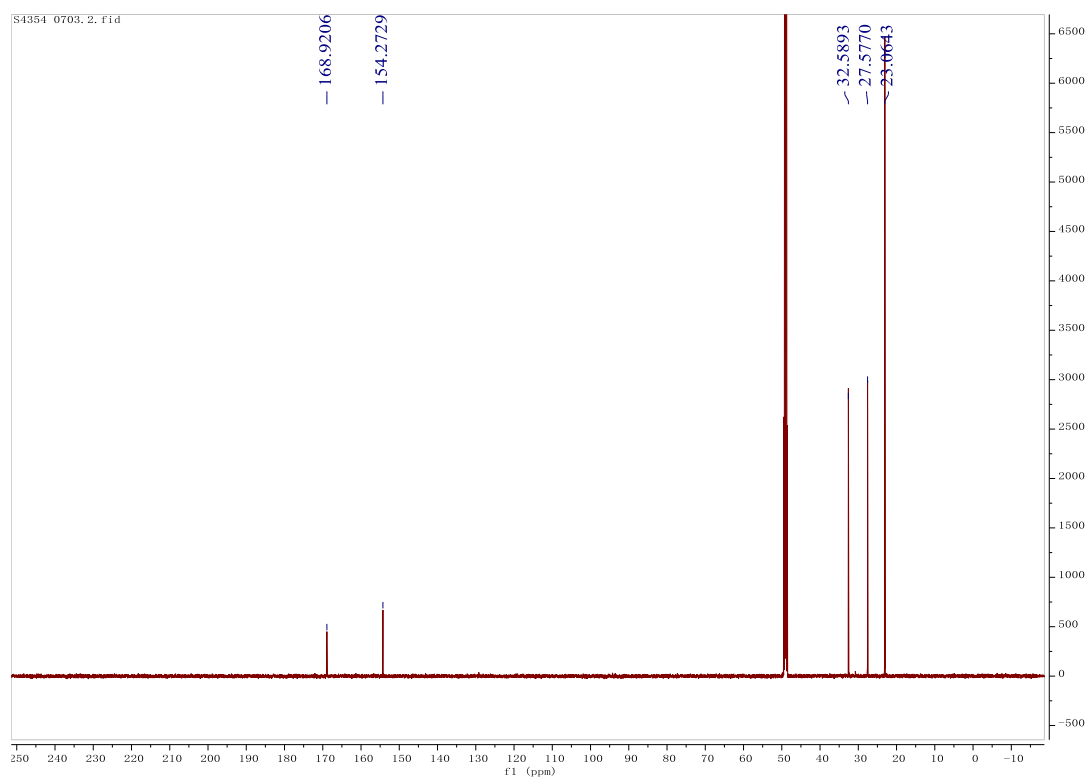

**Figure S61.** <sup>13</sup>C NMR spectrum of compound **9** (CD<sub>3</sub>OD, 150 MHz)

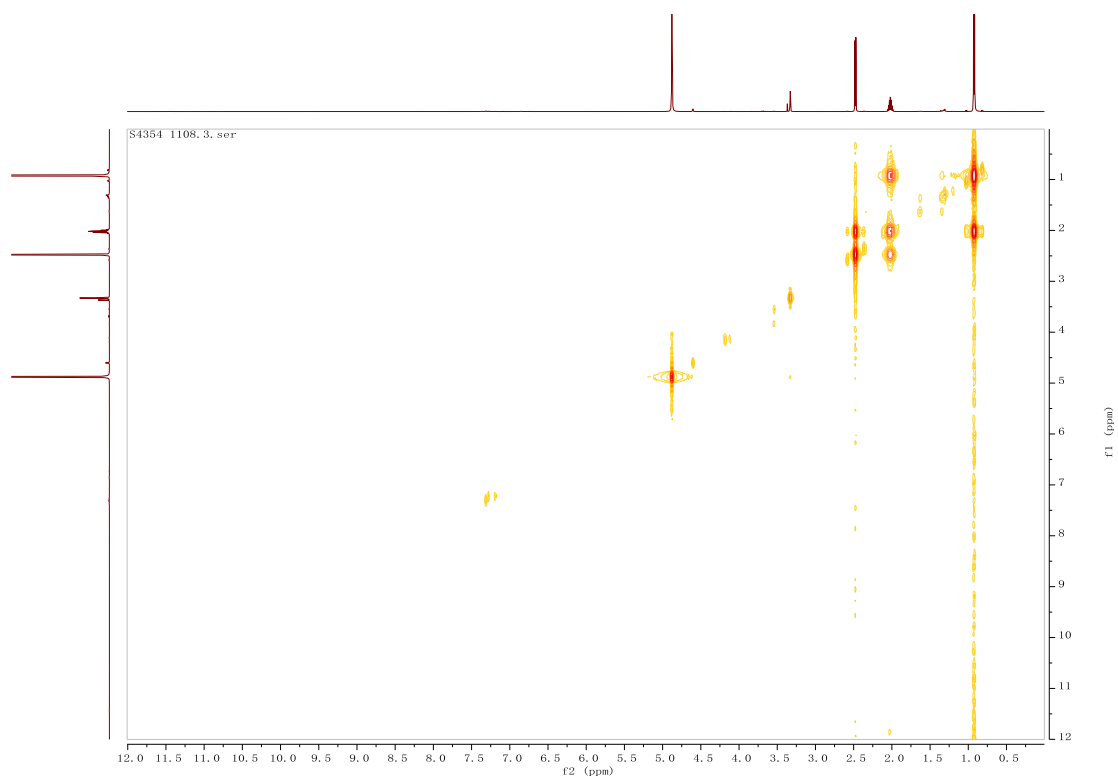

**Figure S62.**  $^1\text{H}$ - $^1\text{H}$  COSY spectrum of compound **9** ( $\text{CD}_3\text{OD}$ )

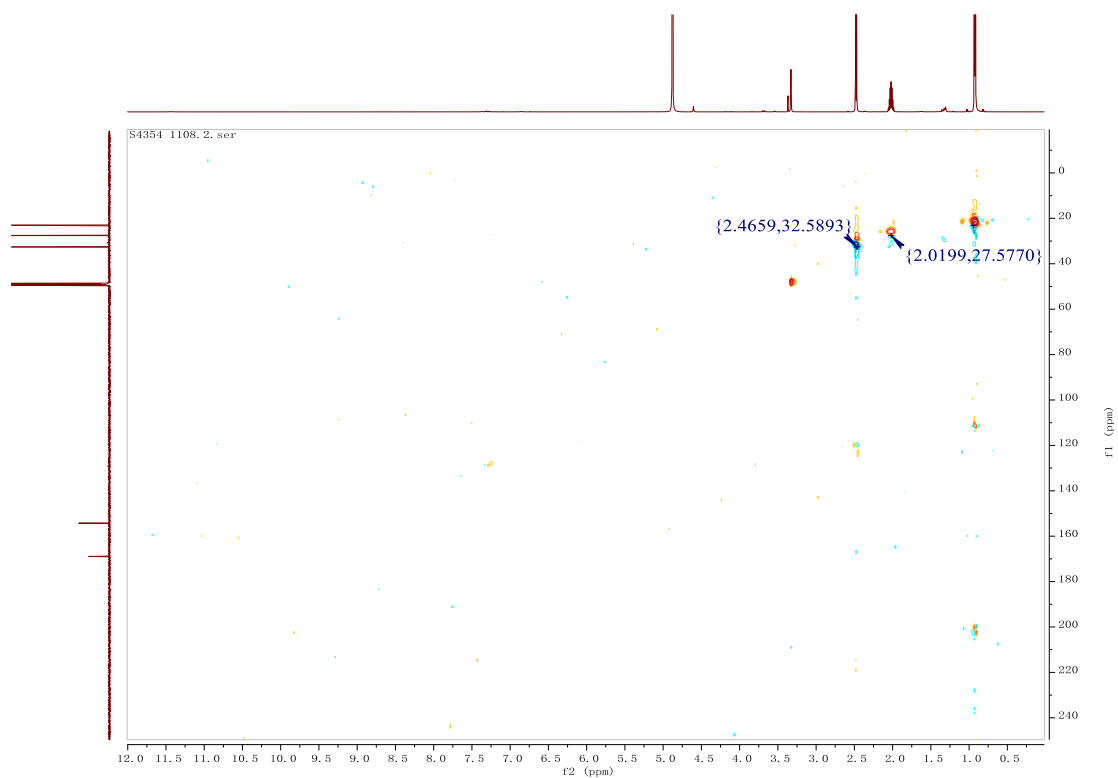

**Figure S63.** HSQC spectrum of compound **9** ( $\text{CD}_3\text{OD}$ )

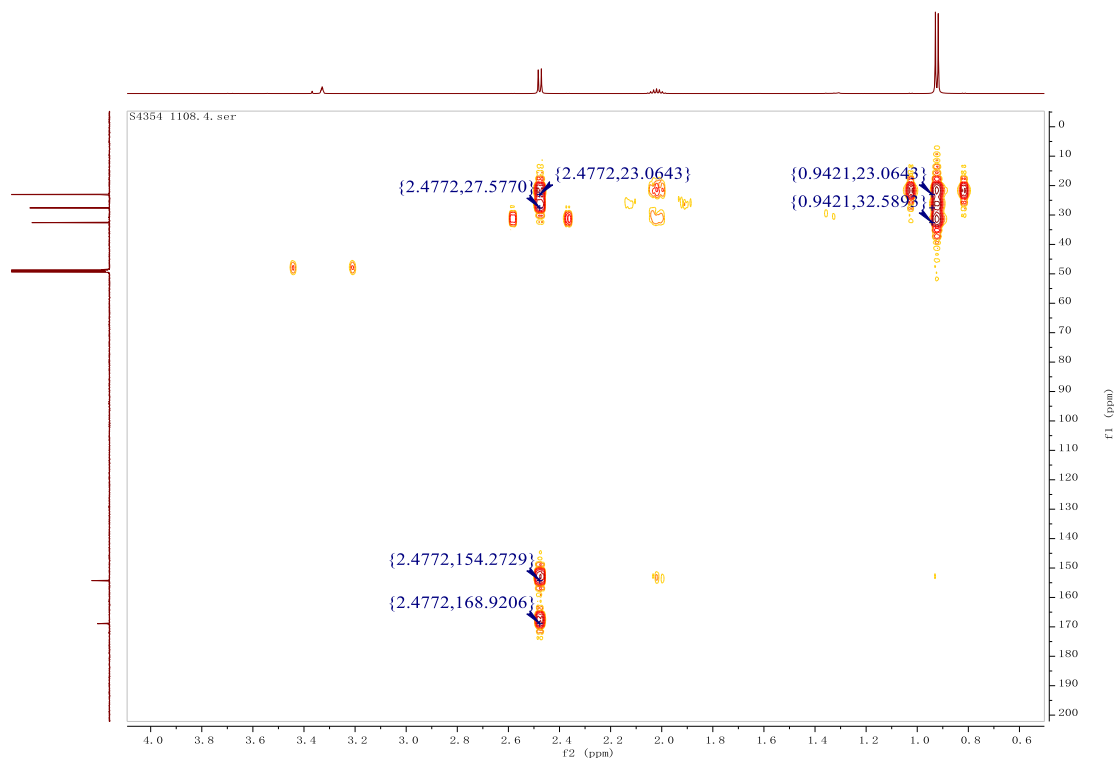

**Figure S64.** HMBC spectrum of compound **9** (CD<sub>3</sub>OD)

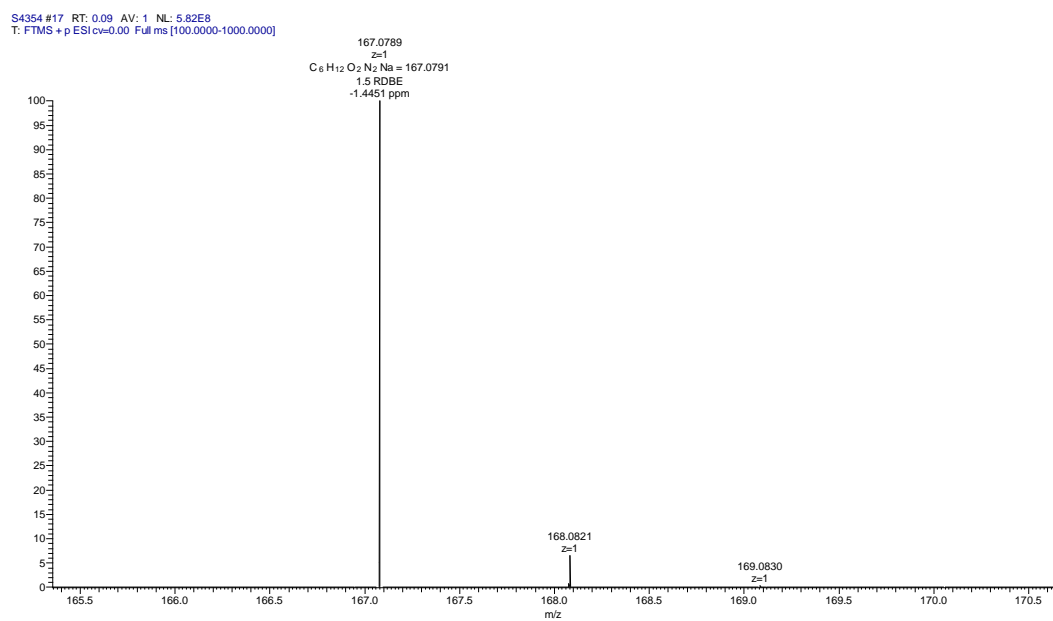

**Figure S65.** HRESIMS spectrum of compound **9**

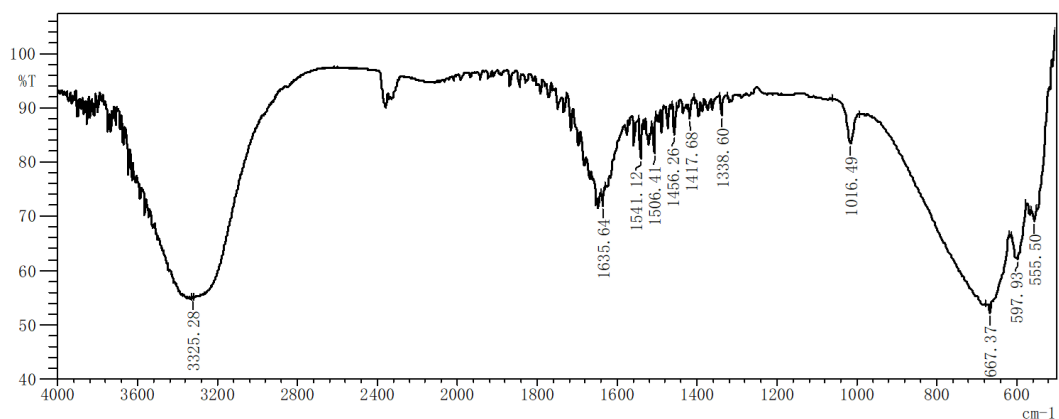

**Figure S66.** IR spectrum of compound **9**

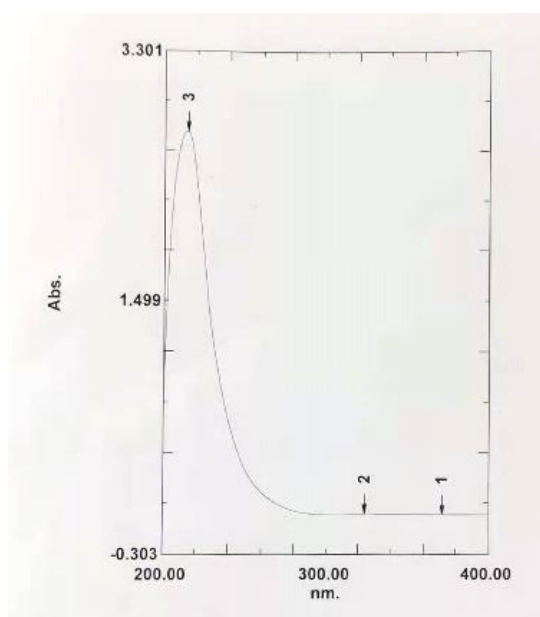

**Figure S67.** UV spectrum of compound **9**

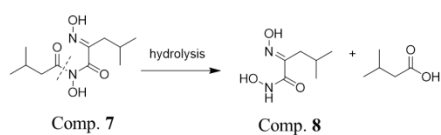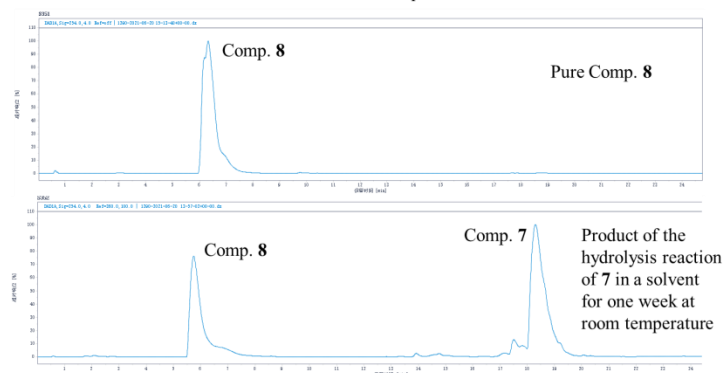

**Figure S68.** Hydrolysis reaction of compound **7**

**Table S1.** Cell Viability (%) of HepG2 treated with compounds **1-9** and lovastatin (5, 10, and 20  $\mu\text{M}$ ).

| Compounds<br>Concentration( $\mu\text{M}$ ) | 1      | 2      | 3      | 4      | 5      | 6      | 7      | 8      | 9      | lovastatin |
|---------------------------------------------|--------|--------|--------|--------|--------|--------|--------|--------|--------|------------|
| 5                                           | 109.56 | 109.56 | 109.31 | 100.06 | 107.19 | 102.75 | 100.56 | 101.04 | 109.52 | 100.84     |
| 10                                          | 108.69 | 105.81 | 105.19 | 100.88 | 107.06 | 100.75 | 104.94 | 109.24 | 116.90 | 100.71     |
| 20                                          | 108.25 | 108.69 | 113.69 | 110.44 | 104.58 | 107.38 | 106.63 | 108.64 | 110.88 | 115.46     |
